# Supplementary material for: Systematic size mediated trapping of anions of varied dimensionality within a dimeric capsular assembly of a flexible neutral bis-urea platform
Source: Royal Society of Chemistry journal article supplement (doi:10.1039/c7dt02308a), 2017-01-01
Supplement: c7dt02308a1.pdf [file c7dt02308a1.pdf]

## **Supporting Information**

### **Systematic Size Mediated Trapping of Anions of Varied Dimensionality within Dimeric Capsular Assembly of a Flexible Neutral Bis-Urea Platform**

Utsab Manna, Santanu Kayal, Biswajit Nayak and Gopal Das\*

*Department of Chemistry, Indian Institute of Technology Guwahati,*

*Assam, 781 039, India.*

*Fax: +91-361-258-2349; Tel: +91-361-258-2313*

*Email: [gdas@iitg.ernet.in](mailto:gdas@iitg.ernet.in)*

## Table of Contents

| Sl. | Content                                                                                                                                                                                    | Page No. |
|-----|--------------------------------------------------------------------------------------------------------------------------------------------------------------------------------------------|----------|
| 1.  | Figure S1, S2. <sup>1</sup> H-NMR and <sup>13</sup> C-NMR spectra of <b>L</b>                                                                                                              | S2       |
| 2.  | Figure S3, S4. HRMS (ESI) and FT-IR spectra of <b>L</b>                                                                                                                                    | S3       |
| 3.  | Figure S5, S6. 2D-NOESY spectra of <b>L</b> and <sup>1</sup> H-NMR spectra of complex <b>1</b>                                                                                             | S4       |
| 4.  | Figure S7, S8. FT-IR spectrum and PXRD pattern of complex <b>1</b>                                                                                                                         | S5       |
| 5.  | Figure S9, S10. 2D-NOESY spectra of <b>L</b> and TGA/DSC spectra of complex <b>1</b>                                                                                                       | S6       |
| 6.  | Figure S11, S12. <sup>1</sup> H-NMR and FT-IR spectra of <b>2a</b>                                                                                                                         | S7       |
| 7.  | Figure S13, S14. PXRD pattern and 2D-NOESY spectra of complex <b>2a</b>                                                                                                                    | S8       |
| 8.  | Figure S15, S16. <sup>1</sup> H-NMR and PXRD pattern of complex <b>2b</b>                                                                                                                  | S9       |
| 9.  | Figure S17, S18. 2D-NOESY spectra of complex <b>2b</b> and <sup>1</sup> H-NMR spectra of complex <b>3</b>                                                                                  | S10      |
| 10. | Figure S19, S20. FT-IR spectra and PXRD pattern of complex <b>3</b>                                                                                                                        | S11      |
| 11. | Figure S21, S22. 2D-NOESY spectra of complex <b>3</b> and <sup>1</sup> H-NMR spectra of complex <b>4</b>                                                                                   | S12      |
| 12. | Figure S23, S24. FT-IR spectrum and PXRD pattern of complex <b>4</b>                                                                                                                       | S13      |
| 13. | Figure S25, S26. 2D-NOESY spectra of complex <b>4</b> and <sup>1</sup> H-NMR spectra of complex <b>5</b>                                                                                   | S14      |
| 14. | Figure S27, S28. <sup>13</sup> C-NMR and FT-IR spectra of complex <b>5</b>                                                                                                                 | S15      |
| 15. | Figure S29, S30. PXRD pattern and 2D-NOESY spectra of complex <b>5</b>                                                                                                                     | S16      |
| 16. | Figure S31, S32. <sup>1</sup> H-NMR and FT-IR spectra of complex <b>6</b>                                                                                                                  | S17      |
| 17. | Figure S33-S34. PXRD pattern and 2D-NOESY spectra of complex <b>6</b>                                                                                                                      | S18      |
| 18. | Figure S35. 2D-NOESY spectra of complex <b>6</b> in presence of excess ( <i>n</i> -TBA) <sub>2</sub> SO <sub>4</sub> salt                                                                  | S19      |
| 19. | Figure S36. Expanded <sup>1</sup> H NMR titration stack plot of <b>L</b> with added <i>n</i> -TBAF in DMSO-d <sub>6</sub>                                                                  | S19      |
| 20. | Figure S37, S38. Expanded <sup>1</sup> H NMR titration stack plot of <b>L</b> with added <i>n</i> -TBACl in DMSO-d <sub>6</sub> and corresponding job's plot                               | S20      |
| 21. | Figure S39, S40. Expanded <sup>1</sup> H NMR titration stack plot of <b>L</b> with added <i>n</i> -TBABr and <i>n</i> -TBAI in DMSO-d <sub>6</sub> and corresponding job's plot            | S21      |
| 22. | Figure S41, S42. Expanded <sup>1</sup> H NMR titration stack plot of <b>L</b> with added ( <i>n</i> -TBA) <sub>2</sub> SO <sub>4</sub> in DMSO-d <sub>6</sub> and corresponding job's plot | S22      |
| 23. | Figure S43, S44. Expanded <sup>1</sup> H NMR titration stack plot of <b>L</b> with added <i>n</i> -TBAOCOCH <sub>4</sub> in DMSO-d <sub>6</sub> and corresponding job's plot               | S23      |
| 24. | Figure S45, S46. Expanded <sup>1</sup> H NMR stack plot of <b>L</b> with added <i>n</i> -TBAH <sub>2</sub> PO <sub>4</sub> in DMSO-d <sub>6</sub> and corresponding job's plot             | S24      |
| 25. | Figure S47. Expanded <sup>1</sup> H NMR titration stack plot of <b>L</b> with added <i>n</i> -TBAHCO <sub>3</sub> in DMSO-d <sub>6</sub>                                                   | S25      |
| 26. | Table S1. Hydrogen bonding table of all anion complexes                                                                                                                                    | S25-S26  |
| 24  | Figure S48. Scatter plot of N-H...A angle vs. H...A distance all anion complexes of <b>L</b>                                                                                               | S27      |
| 25  | Figure S49-56. Spacefill orientations and packing figures of free <b>L</b> , complex <b>1</b> , <b>2a</b> , <b>2b</b> , <b>3</b> , <b>4</b> , <b>5</b> and <b>6</b>                        | S28-S31  |

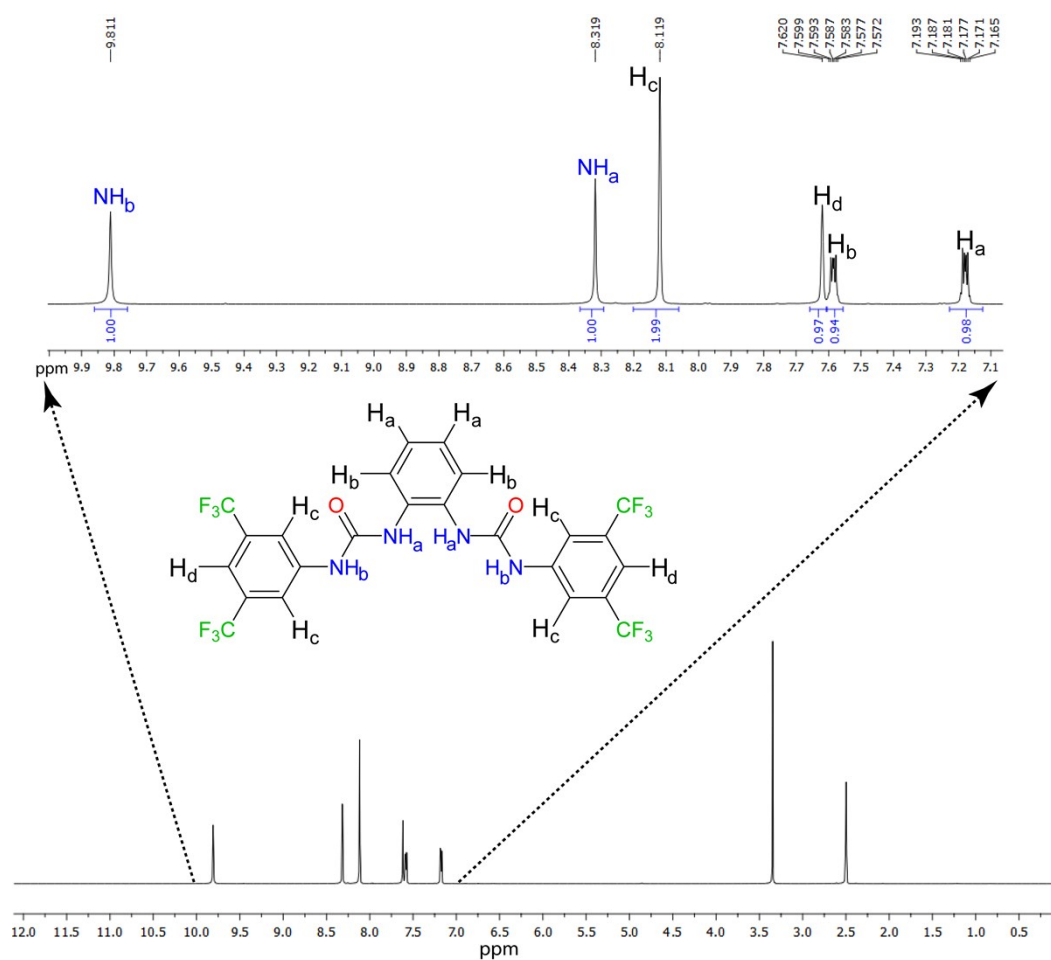

**Figure S1.**  $^1\text{H}$  NMR spectrum of receptor **L** at 25°C and interpretation of all hydrogen atoms of the receptor (600 MHz,  $\text{DMSO-d}_6$ )  $\delta$  (ppm): 7.165-7.193 (m, 2H, Ar-H), 7.572-7.599 (m, 2H, Ar-H), 7.620 (s, 4H, Ar-H), 8.119 (s, 2H, Ar-H), 8.319 (s, 2H,  $\text{NH}_a$ ), 9.811 (s, 2H,  $\text{NH}_b$ ).

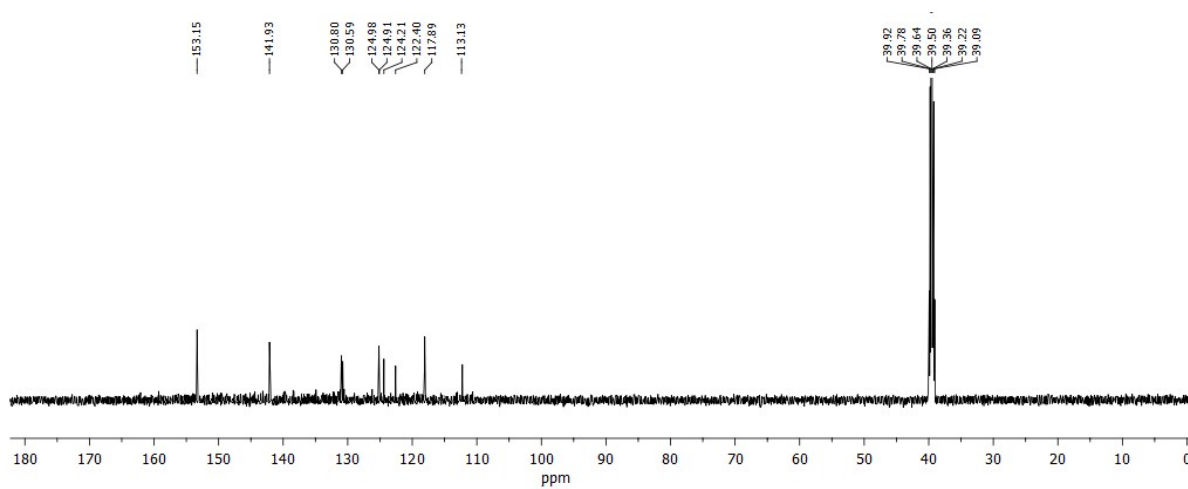

**Figure S2.**  $^{13}\text{C}$  NMR spectrum of receptor **L** at 25°C (150 MHz,  $\text{DMSO-d}_6$ )  $\delta$  (ppm): 113.13 ( $\times 1\text{C}$ , Ar-C), 117.89 ( $\times 1\text{C}$ , Ar-C), 122.40 ( $\times 2\text{C}$ , Ar-C), 124.21 ( $\times 2\text{C}$ , Ar-C), 124.91 ( $\times 4\text{C}$ , Ar-C), 124.98 ( $\times 4\text{C}$ , Ar-C), 130.59 ( $\times 4\text{C}$ , Ar-C), 130.80 ( $\times 2\text{C}$ , Ar-C), 141.93 ( $\times 2\text{C}$ , Ar), 153.15 ( $\times 2\text{C}$ ,  $-\text{C}=\text{O}$ ).

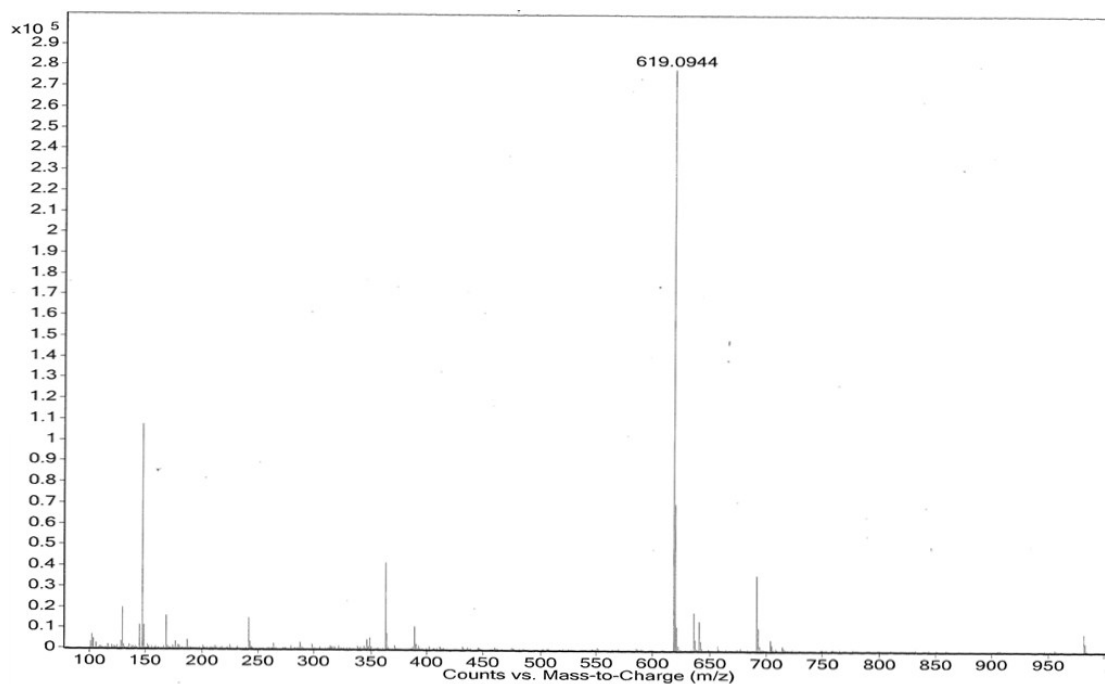

**Figure S3.** ESI-Mass spectrum of receptor **L**. ESI-MS:  $m/z$  619.0944 [ $\text{L}+\text{H}$ ].

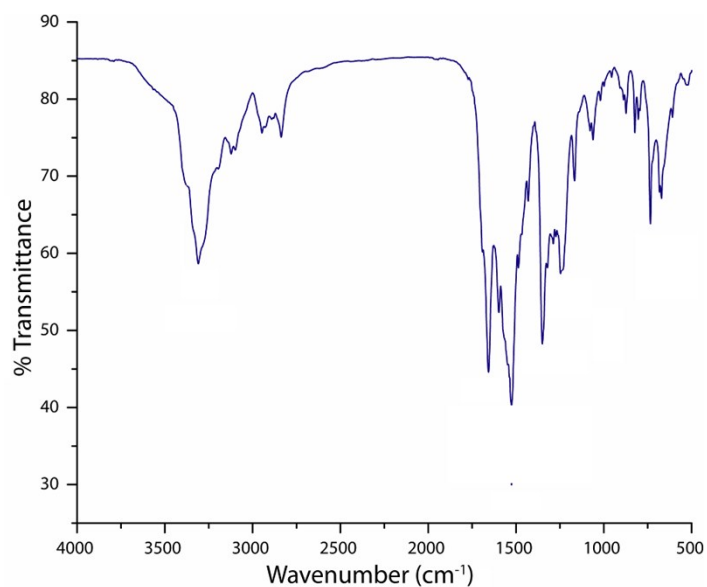

**Figure S4.** FT-IR spectrum of receptor  $L_1$  recorded in KBr pellet at 25°C: 3327  $\text{cm}^{-1}$   $\nu_s(\text{N-H})$ , 3138  $\text{cm}^{-1}$   $\nu_s(\text{C-H})$ , 1670  $\text{cm}^{-1}$   $\nu_s(\text{C=O})$ , 1257  $\text{cm}^{-1}$   $\nu_s(\text{C-F})$ .

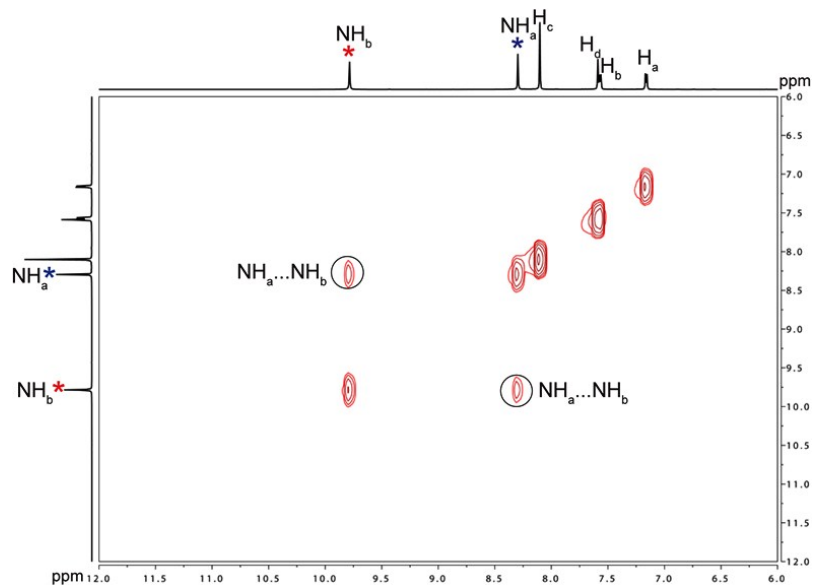

**Figure S5.** 2D-NOESY NMR spectra of  $L$  in DMSO- $d_6$  at 298 K

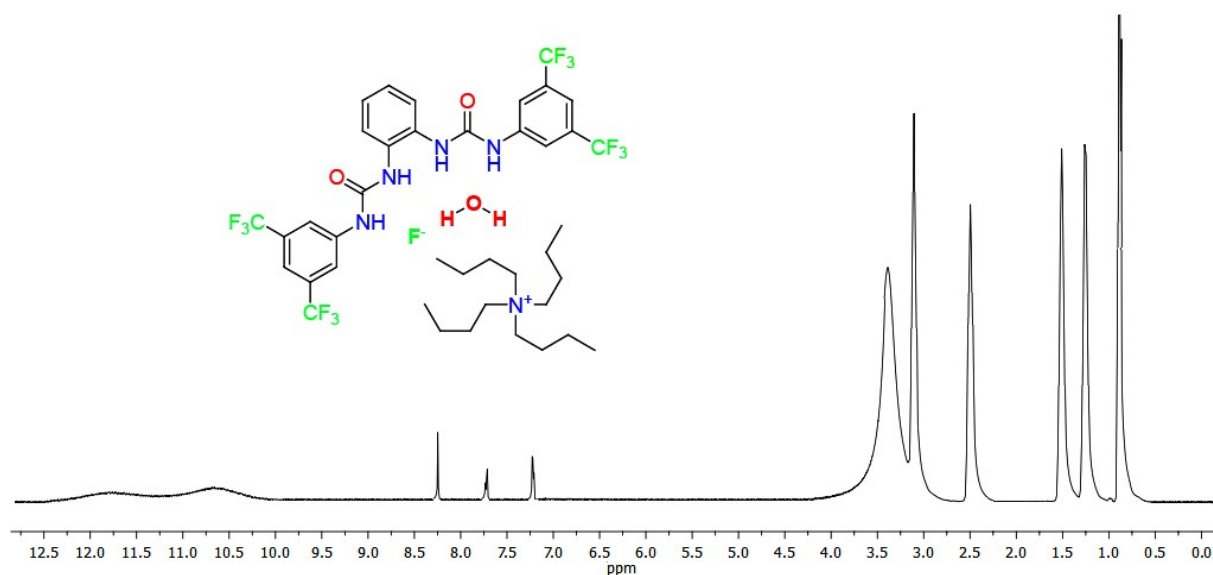

**Figure S6.**  $^1\text{H-NMR}$  spectrum of complex  $1$  in DMSO- $d_6$  at 25°C, (600 MHz, DMSO- $d_6$ )  $\delta$  (ppm): 0.914-0.939 (t, 12H,  $\sim 7.8$  Hz, TBA- $\text{CH}_3$ ), 1.269-1.330 (m, 8H, TBA- $\text{CH}_2$ ), 1.529-1.581 (m, 8H, TBA- $\text{CH}_2$ ), 3.136-3.165 (t, 8H,  $\sim 8.4$  Hz,  $\text{N}^+$ -TBA- $\text{CH}_2$ ), 7.156-7.184 (m, 2H, Ar-H), 7.599-7.627 (m, 2H, Ar-H), 7.596 (s, 4H, Ar-H), 8.114 (s, 2H, Ar-H), 10.685 (s, 2H,  $\text{NH}_a$ ), 11.788 (s, 2H,  $\text{NH}_b$ ).

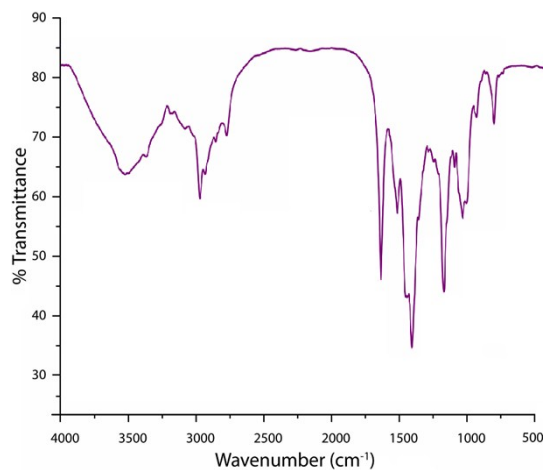

**Figure S7.** FT-IR spectrum of complex **1** recorded in KBr pellet at 25°C: 3476  $\text{cm}^{-1}$   $\nu_{\text{s}}(\text{O-H})$ , 3368  $\text{cm}^{-1}$   $\nu_{\text{s}}(\text{N-H})$ , 3028  $\text{cm}^{-1}$   $\nu_{\text{s}}(\text{C-H})$ , 2863  $\text{cm}^{-1}$   $\nu_{\text{s}}(\text{C-H})$ , 1674  $\text{cm}^{-1}$   $\nu_{\text{s}}(\text{C=O})$ , 1268  $\text{cm}^{-1}$   $\nu_{\text{s}}(\text{C-F})$ .

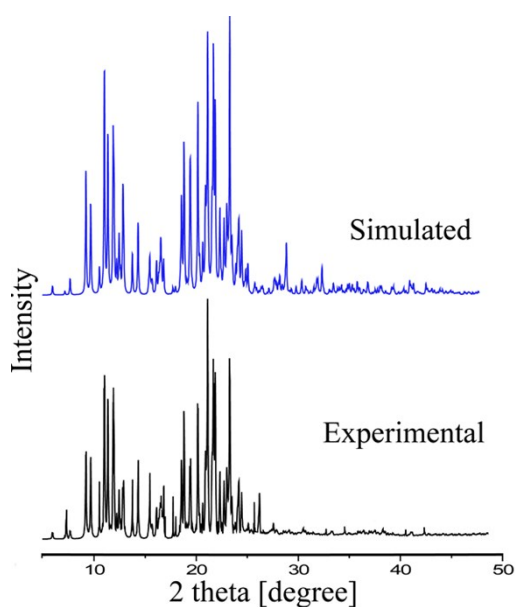

**Figure S8.** Powder X-ray diffraction: simulated pattern from the single-crystal X-ray of complex **1** (blue), experimental pattern from the crystalline solid of complex **1** (black).

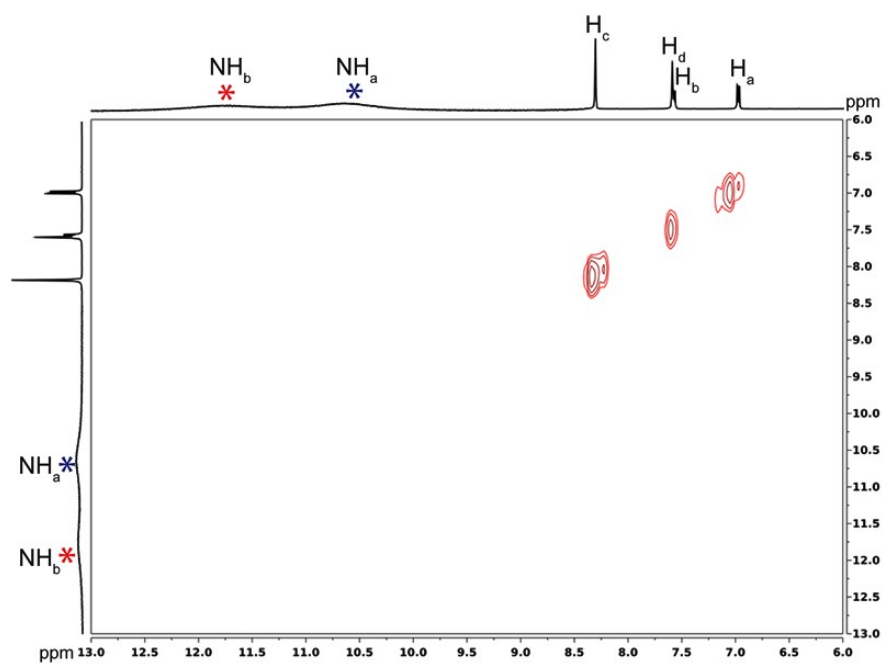

**Figure S9.** 2D-NOESY NMR spectra of complex **1** in DMSO-d<sub>6</sub> at 298 K.

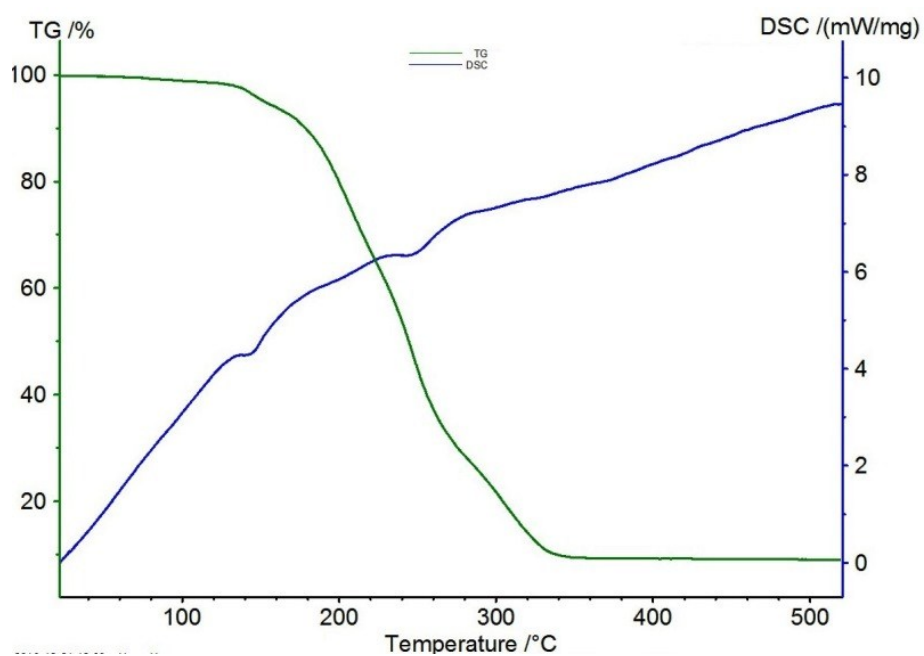

**Figure S10.** Thermo gravimetric (TGA) and Differential scanning calorimetry (DSC) curve of only hydrated-fluoride complex **1** obtained at a heating rate of 10°C/min in N<sub>2</sub> atmosphere.

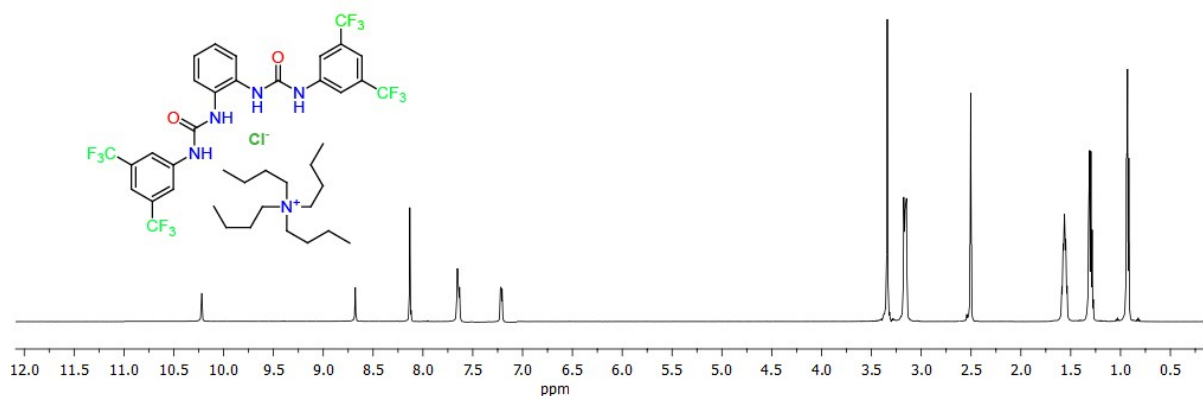

**Figure S11.**  $^1\text{H-NMR}$  spectrum of complex **2a** in  $\text{DMSO-d}_6$  at  $25^\circ\text{C}$ , (600 MHz,  $\text{DMSO-d}_6$ )  $\delta$  (ppm): 0.914-0.938 (t, 12H,  $\sim 7.2$  Hz, TBA- $\text{CH}_3$ ), 1.270-1.331 (m, 8H, TBA- $\text{CH}_2$ ), 1.533-1.586 (m, 8H, TBA- $\text{CH}_2$ ), 3.144-3.172 (t, 8H,  $\sim 8.4$  Hz,  $\text{N}^+$ -TBA- $\text{CH}_2$ ), 7.154-7.183 (m, 2H, Ar-H), 7.596-7.625 (m, 2H, Ar-H), 7.623 (s, 4H, Ar-H), 8.128 (s, 2H, Ar-H), 8.636 (s, 2H,  $\text{NH}_a$ ), 10.246 (s, 2H,  $\text{NH}_b$ ).

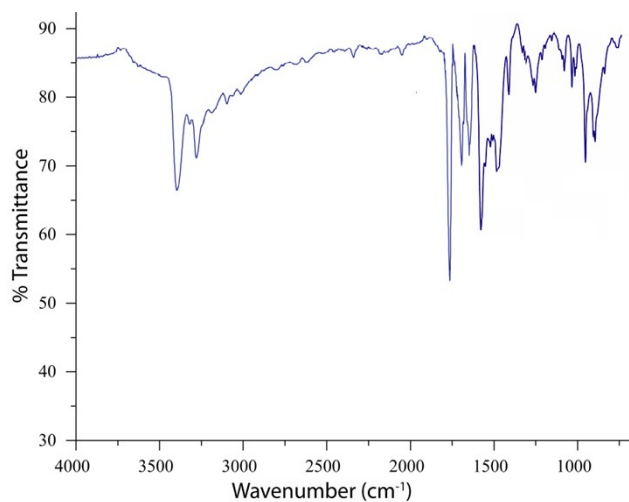

**Figure S12.** FT-IR spectrum of complex **2a** recorded in KBr pellet at  $25^\circ\text{C}$ :  $3354\text{ cm}^{-1}$   $\nu_s(\text{N-H})$   $3024\text{ cm}^{-1}$   $\nu_s(\text{C-H})$ ,  $2850\text{ cm}^{-1}$   $\nu_s(\text{C-H})$ ,  $1668\text{ cm}^{-1}$   $\nu_s(\text{C=O})$ ,  $1256\text{ cm}^{-1}$   $\nu_s(\text{C-F})$ .



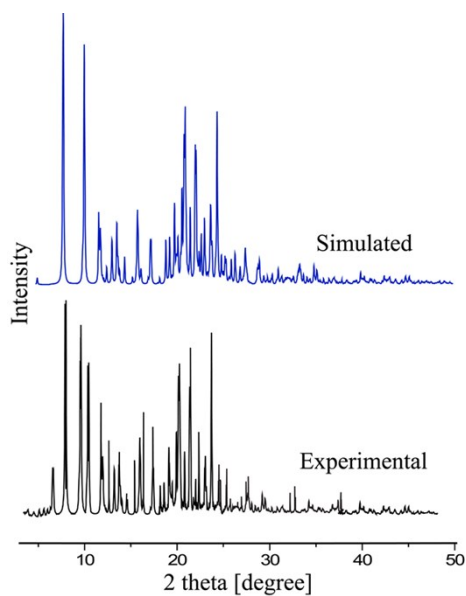

**Figure S13.** Powder X-ray diffraction: simulated pattern from the single-crystal X-ray of complex **2a** (blue), experimental pattern from the crystalline solid of complex **2a** (black).

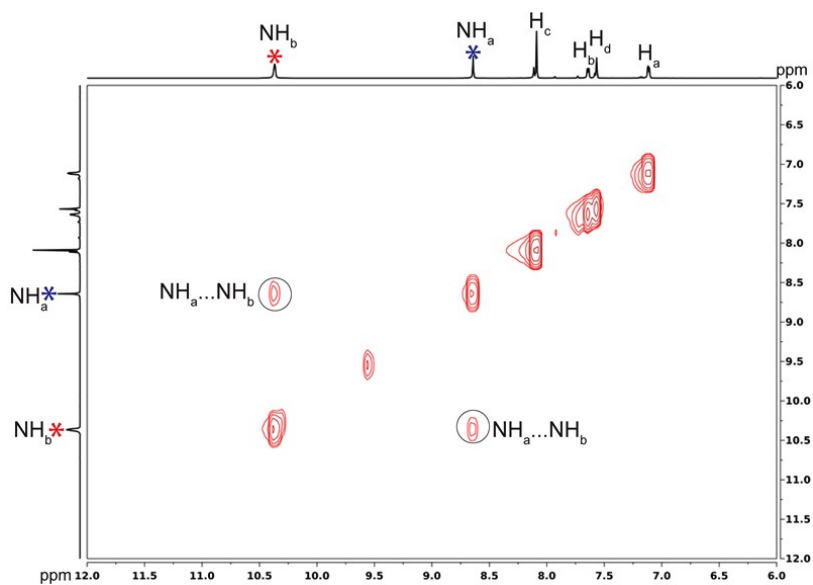

**Figure S14.** 2D-NOESY NMR spectra of complex **2a** in DMSO- $d_6$  at 298 K.

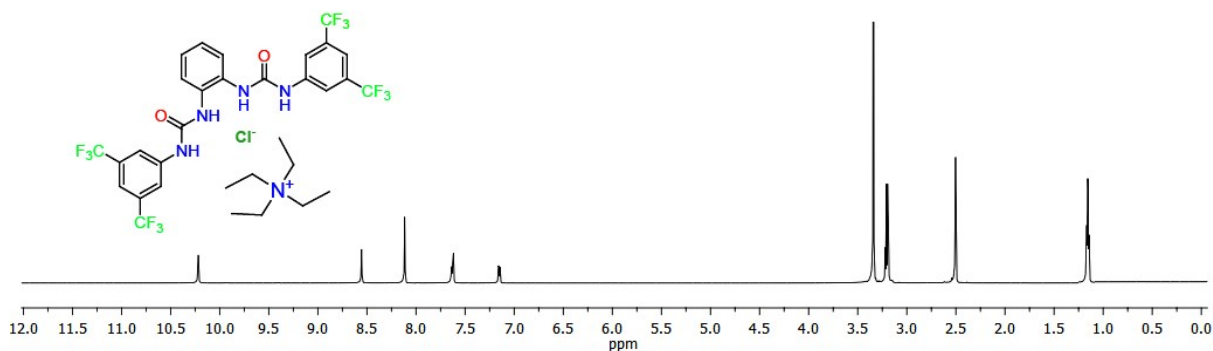

**Figure S15.**  $^1\text{H}$ -NMR spectrum of complex **2b** in  $\text{DMSO-d}_6$  at  $25^\circ\text{C}$ , (600 MHz,  $\text{DMSO-d}_6$ )  $\delta$  (ppm): 1.141-1.165 (t, 12H,  $\sim 7.2$  Hz, TEA- $\text{CH}_3$ ), 3.181-3.217 (q, 8H,  $\sim 7.2$  Hz,  $\text{N}^+$ -TEA- $\text{CH}_2$ ), 7.135-7.162 (m, 2H, Ar-H), 7.614-7.644 (m, 2H, Ar-H), 7.615 (s, 4H, Ar-H), 8.112 (s, 2H, Ar-H), 8.355 (s, 2H,  $\text{NH}_a$ ), 10.218 (s, 2H,  $\text{NH}_b$ ).

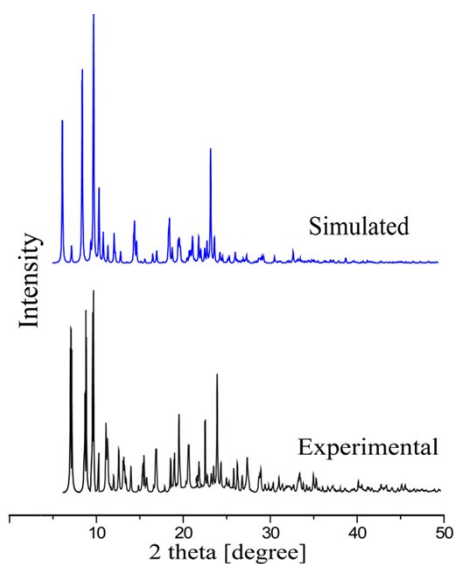

**Figure S16.** Powder X-ray diffraction: simulated pattern from the single-crystal X-ray of complex **2b** (blue), experimental pattern from the crystalline solid of complex **2b** (black).

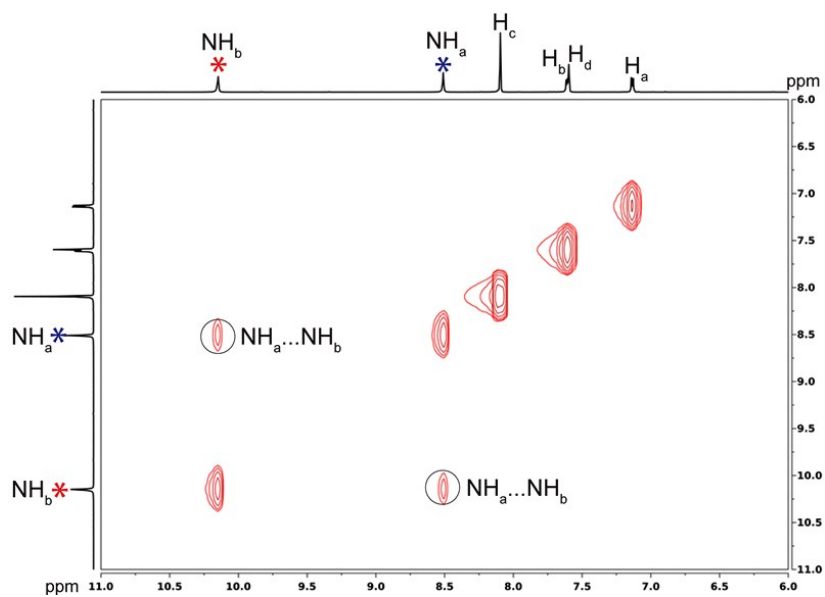

**Figure S17.** 2D-NOESY NMR spectra of complex **2b** in DMSO- $d_6$  at 298 K.

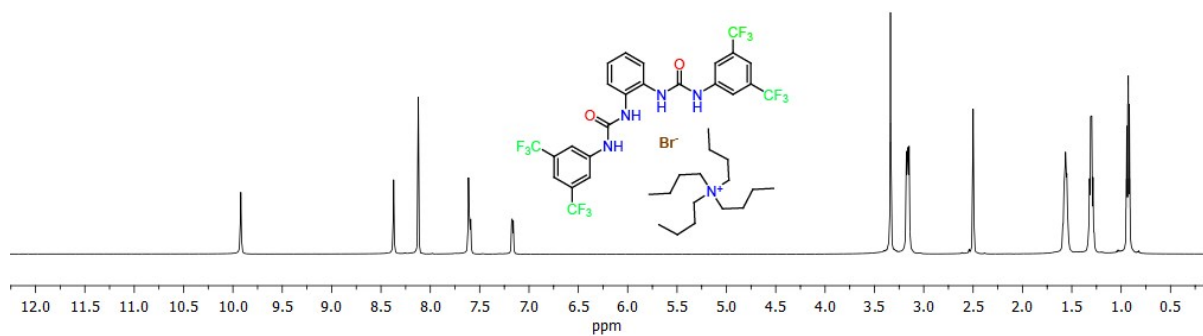

**Figure S18.**  $^1\text{H}$ -NMR spectrum of complex **3** in DMSO- $d_6$  at 25°C, (600 MHz, DMSO- $d_6$ )  $\delta$  (ppm): 0.917-0.942 (t, 12H,  $\sim$ 7.8 Hz, TBA- $\text{CH}_3$ ), 1.273-1.334 (m, 8H, TBA- $\text{CH}_2$ ), 1.538-1.589 (m, 8H, TBA- $\text{CH}_2$ ), 3.148-3.176 (t, 8H,  $\sim$  8.4 Hz,  $\text{N}^+$ -TBA- $\text{CH}_2$ ), 7.154-7.182 (m, 2H, Ar-H), 7.585-7.613 (m, 2H, Ar-H), 7.613 (s, 4H, Ar-H), 8.121 (s, 2H, Ar-H), 8.121 (s, 2H,  $\text{NH}_a$ ), 9.920 (s, 2H,  $\text{NH}_b$ ).

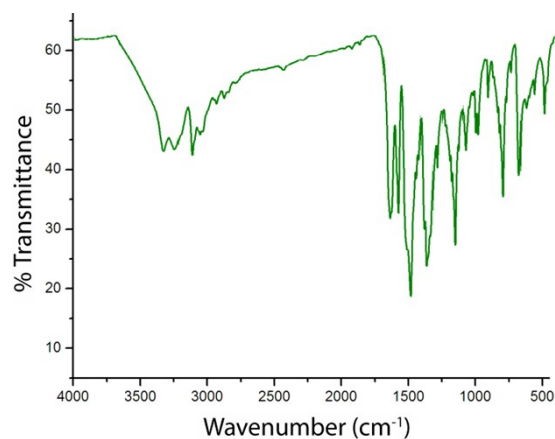

**Figure S19.** FT-IR spectrum of complex **3** recorded in KBr pellet at 25°C: 3350  $\text{cm}^{-1}$   $\nu_s(\text{N-H})$  3031  $\text{cm}^{-1}$   $\nu_s(\text{C-H})$ , 2853  $\text{cm}^{-1}$   $\nu_s(\text{C-H})$ , 1670  $\text{cm}^{-1}$   $\nu_s(\text{C=O})$ , 1244  $\text{cm}^{-1}$   $\nu_s(\text{C-F})$ .

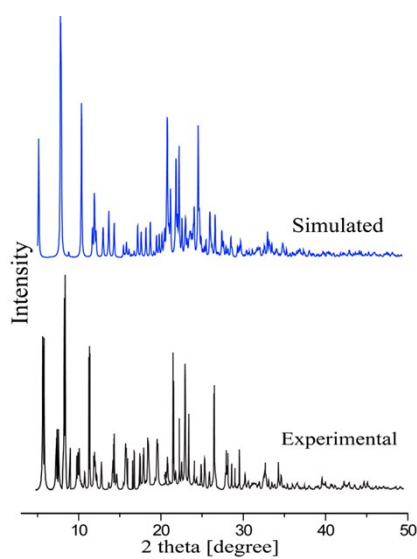

**Figure S20.** Powder X-ray diffraction: simulated pattern from the single-crystal X-ray of complex **3** (blue), experimental pattern from the crystalline solid of complex **3** (black).

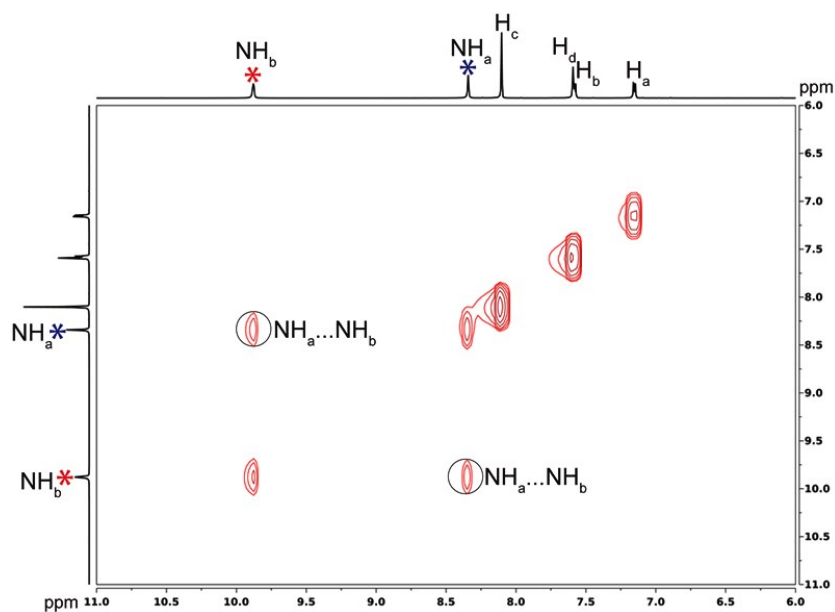

**Figure S21.** 2D-NOESY NMR spectra of complex **3** in DMSO- $d_6$  at 298 K.

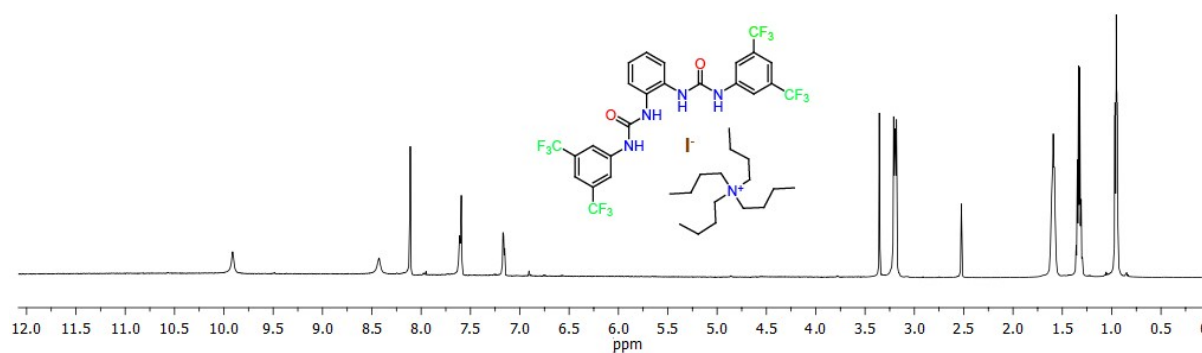

**Figure S22.**  $^1\text{H}$ -NMR spectrum of complex **4** in DMSO- $d_6$  at 25°C, (400 MHz, DMSO- $d_6$ )  $\delta$  (ppm): 0.918-0.942 (t, 12H,  $\sim$ 7.8 Hz, TBA-CH<sub>3</sub>), 1.275-1.336 (m, 8H, TBA-CH<sub>2</sub>), 1.542-1.594 (m, 8H, TBA-CH<sub>2</sub>), 3.158-3.186 (t, 8H,  $\sim$ 8.4 Hz, N<sup>+</sup>-TBA-CH<sub>2</sub>), 7.149-7.177 (m, 2H, Ar-H), 7.593 (s, 4H, Ar-H), 7.595-7.622 (m, 2H, Ar-H), 8.111 (s, 2H, Ar-H), 8.427 (s, 2H, NH<sub>a</sub>), 9.911 (s, 2H, NH<sub>b</sub>).

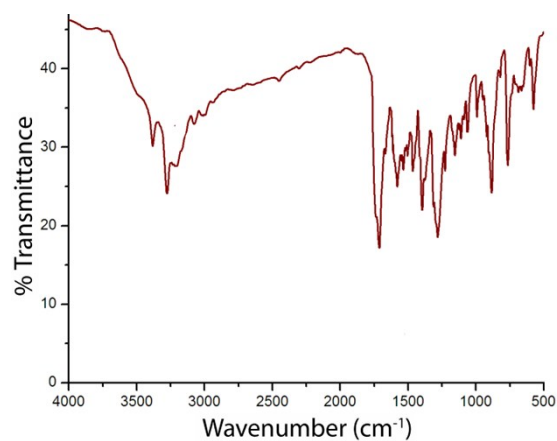

**Figure S23.** FT-IR spectrum of complex **4** recorded in KBr pellet at 25°C: 3338  $\text{cm}^{-1}$  *vs*(C-H) 3034  $\text{cm}^{-1}$  *vs* (C-H), 2858  $\text{cm}^{-1}$  *vs*(C-H), 1677  $\text{cm}^{-1}$  *vs*(C=O), 1237  $\text{cm}^{-1}$  *vs*(C-F).

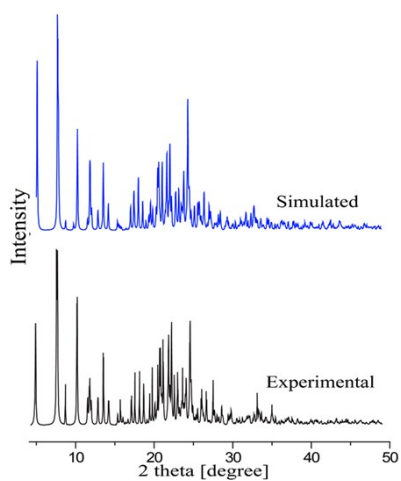

**Figure S24.** Powder X-ray diffraction: simulated pattern from the single-crystal X-ray of complex **4** (blue), experimental pattern from the crystalline solid of complex **4** (black).

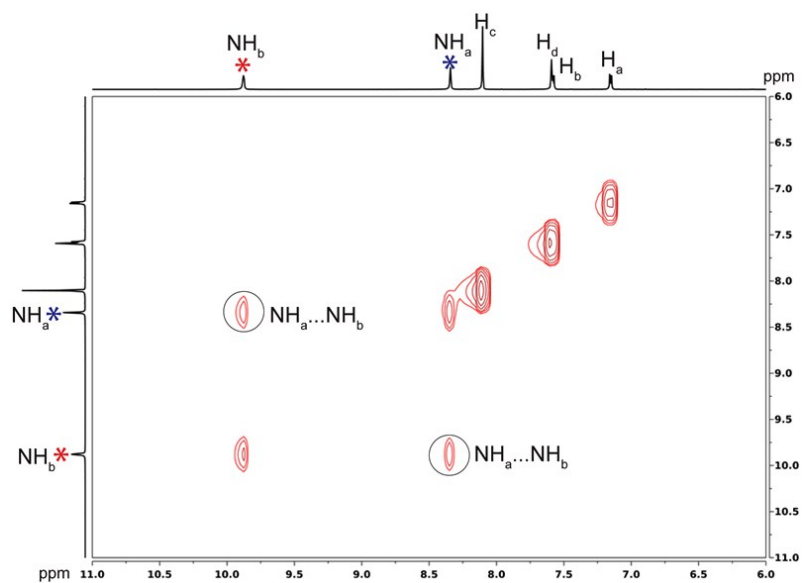

**Figure S25.** 2D-NOESY NMR spectra of complex **4** in DMSO- $d_6$  at 298 K.

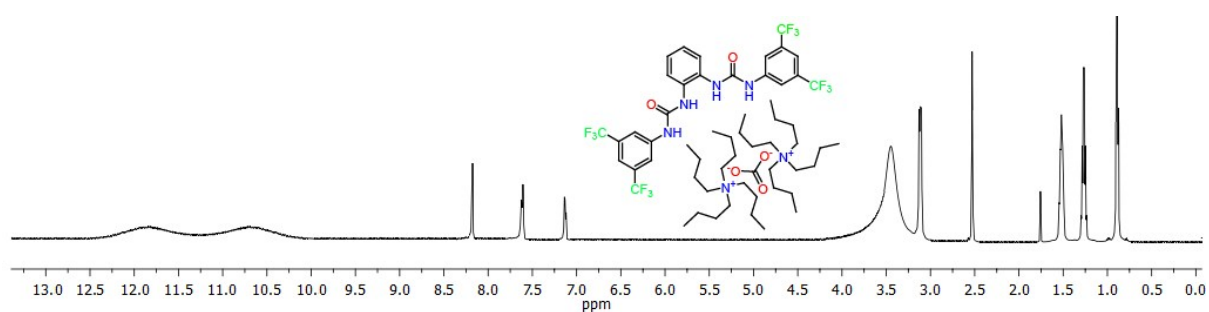

**Figure S26.**  $^1\text{H}$ -NMR spectrum of complex **5** in DMSO- $d_6$  at 25°C, (600 MHz, DMSO- $d_6$ )  $\delta$  (ppm): 0.912-0.937 (t, 24H,  $\sim$ 7.2 Hz, TBA- $\text{CH}_3$ ), 1.267-1.328 (m, 16H, TBA- $\text{CH}_2$ ), 1.527-1.580 (m, 16H, TBA- $\text{CH}_2$ ), 3.135-3.163 (t, 16H,  $\sim$  8.4 Hz,  $\text{N}^+$ -TBA- $\text{CH}_2$ ), 7.158-7.187 (m, 2H, Ar-H), 7.602-7.629 (m, 2H, Ar-H), 7.599 (s, 4H, Ar-H), 8.121 (s, 2H, Ar-H), 10.558 (s, 2H,  $\text{NH}_a$ ), 11.699 (s, 2H,  $\text{NH}_b$ ).

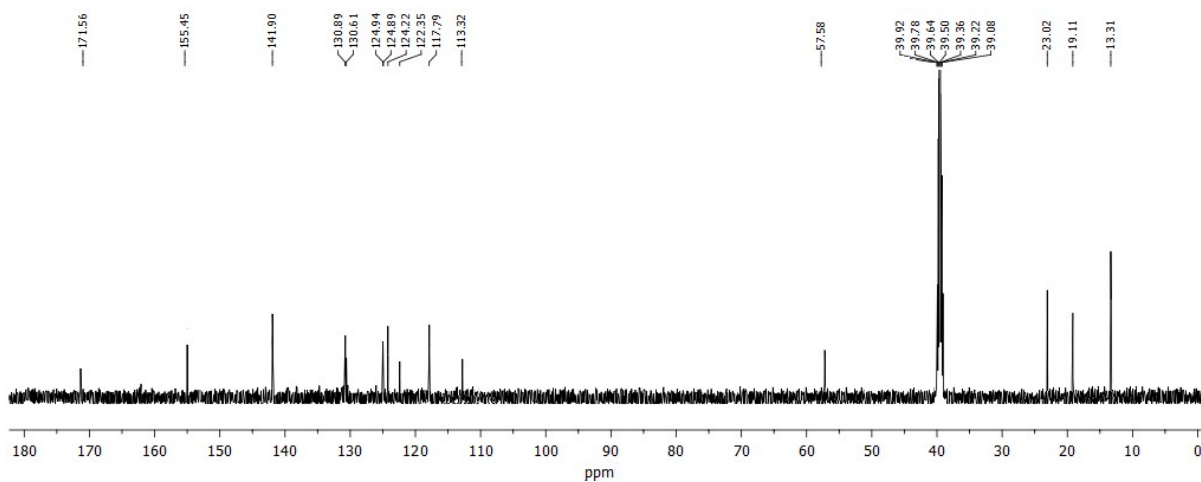

**Figure S27.**  $^{13}\text{C}$ -NMR spectrum of complex **5** in  $\text{DMSO-d}_6$  at  $25^\circ\text{C}$ , (150 MHz,  $\text{DMSO-d}_6$ )  $\delta$  (ppm): 13.31 ( $\times 8\text{C}$ , TBA- $\text{CH}_3$ ), 19.11 ( $\times 8\text{C}$ , TBA- $\text{CH}_2$ ), 23.02 ( $\times 8\text{C}$ , TBA- $\text{CH}_2$ ), 57.58 ( $\times 8\text{C}$ , TBA- $\text{N}^+\text{CH}_2$ ), 113.32 ( $\times 1\text{C}$ , Ar-C), 117.79 ( $\times 1\text{C}$ , Ar-C), 122.35 ( $\times 2\text{C}$ , Ar-C), 124.22 ( $\times 2\text{C}$ , Ar-C), 124.89 ( $\times 4\text{C}$ , Ar-C), 124.94 ( $\times 4\text{C}$ , Ar-C), 130.61 ( $\times 4\text{C}$ , Ar-C), 130.89 ( $\times 2\text{C}$ , Ar-C), 141.90 ( $\times 2\text{C}$ , Ar), 155.45 ( $\times 2\text{C}$ , -C=O), 171.56 ( $\times 1\text{C}$ , Carbonate-C=O).

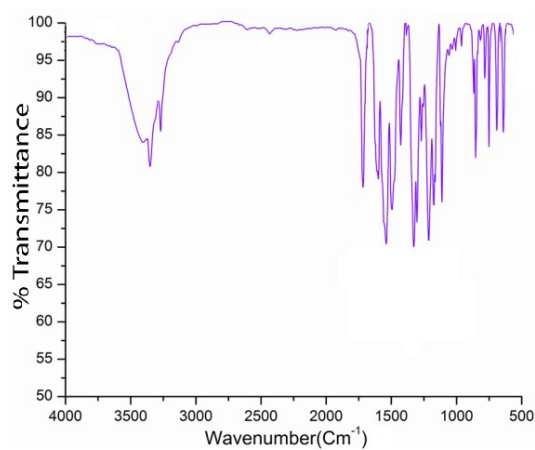

**Figure S28.** FT-IR spectrum of complex **5** recorded in KBr pellet at  $25^\circ\text{C}$ : IR spectra (KBr pellet):  $3382\text{ cm}^{-1}$  vs(N-H),  $3044\text{ cm}^{-1}$  vs (C-H),  $2862\text{ cm}^{-1}$  vs(C-H),  $1665\text{ cm}^{-1}$  vs(C=O),  $1245\text{ cm}^{-1}$  vs(C-F).



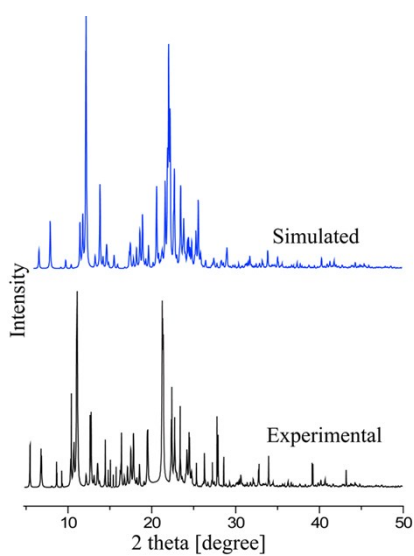

**Figure S29.** Powder X-ray diffraction: simulated pattern from the single-crystal X-ray of complex **5** (blue), experimental pattern from the crystalline solid of complex **5** (black).

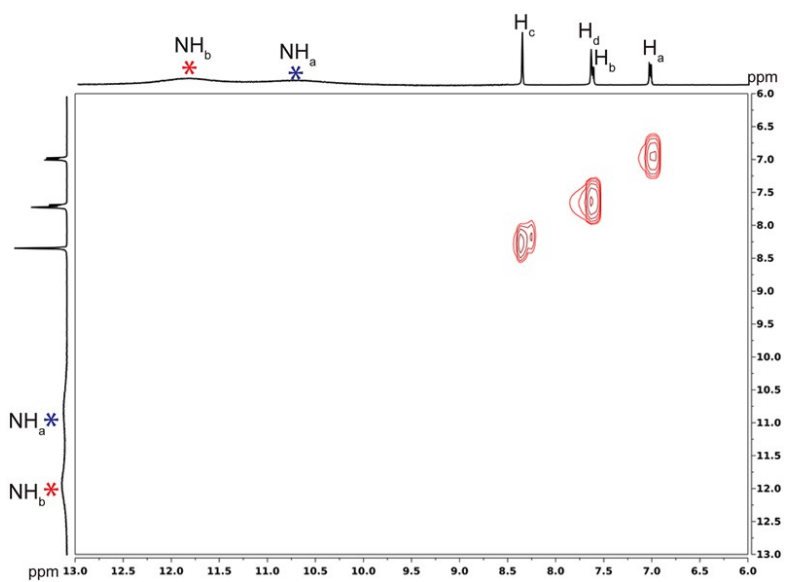

**Figure S30.** 2D-NOESY NMR spectra of complex **5** in DMSO- $d_6$  at 298 K.

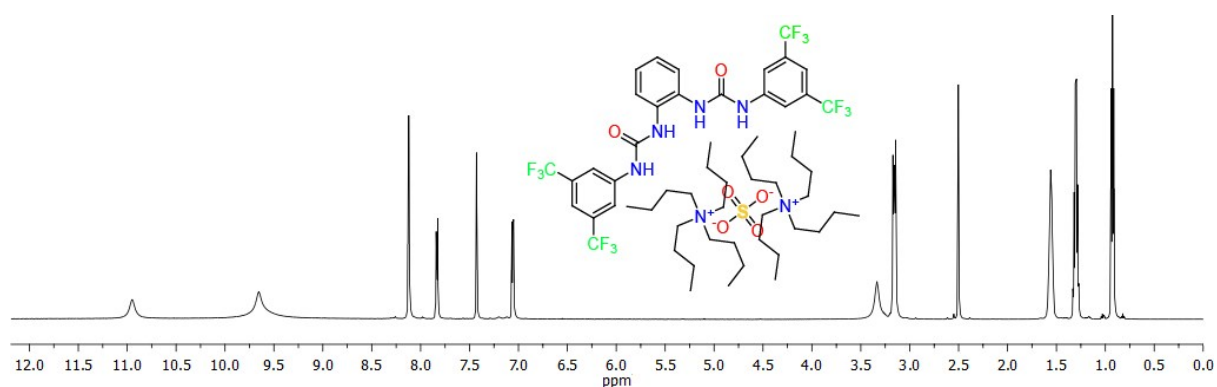

**Figure S31.**  $^1\text{H-NMR}$  spectrum of complex **6** in  $\text{DMSO-d}_6$  at  $25^\circ\text{C}$ , (600 MHz,  $\text{DMSO-d}_6$ )  $\delta$  (ppm): 0.912-0.936 (t, 24H,  $\sim 7.2$  Hz, TBA- $\text{CH}_3$ ), 1.267-1.329 (m, 16H, TBA- $\text{CH}_2$ ), 1.530-1.583 (m, 16H, TBA- $\text{CH}_2$ ), 3.141-3.169 (t, 16H,  $\sim 8.4$  Hz,  $\text{N}^+$ -TBA- $\text{CH}_2$ ), 7.041-7.069 (m, 2H, Ar-H), 7.426 (s, 4H, Ar-H), 7.816-7.844 (m, 2H, Ar-H), 8.119 (s, 2H, Ar-H), 9.651 (s, 2H,  $\text{NH}_a$ ), 10.945 (s, 2H,  $\text{NH}_b$ ).

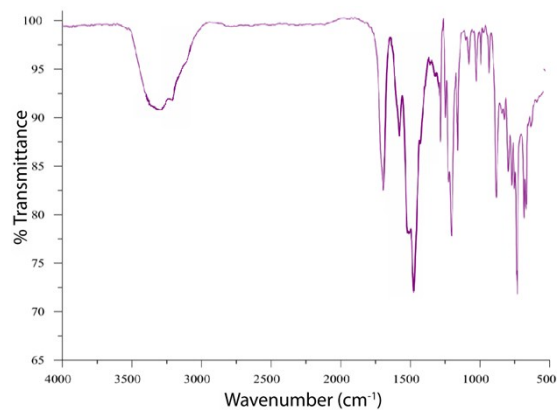

**Figure S32.** FT-IR spectrum of complex **6** recorded in KBr pellet at  $25^\circ\text{C}$ :  $3387\text{ cm}^{-1}$  vs(N-H),  $3052\text{ cm}^{-1}$  vs (C-H),  $2857\text{ cm}^{-1}$  vs(C-H),  $1678\text{ cm}^{-1}$  vs(C=O),  $1238\text{ cm}^{-1}$  vs(C-F).

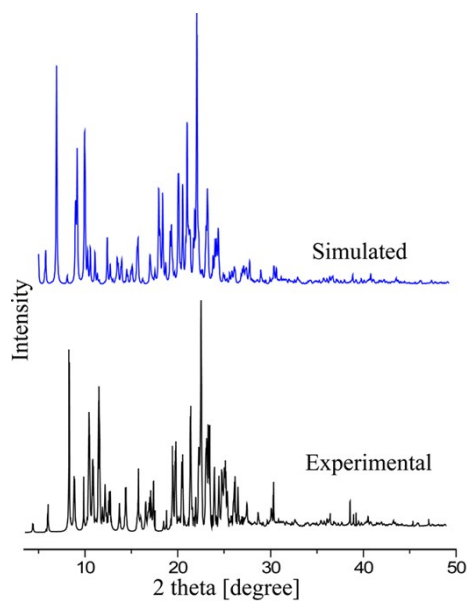

**Figure S33.** Powder X-ray diffraction: simulated pattern from the single-crystal X-ray of complex **6** (blue), experimental pattern from the crystalline solid of complex **6** (black).

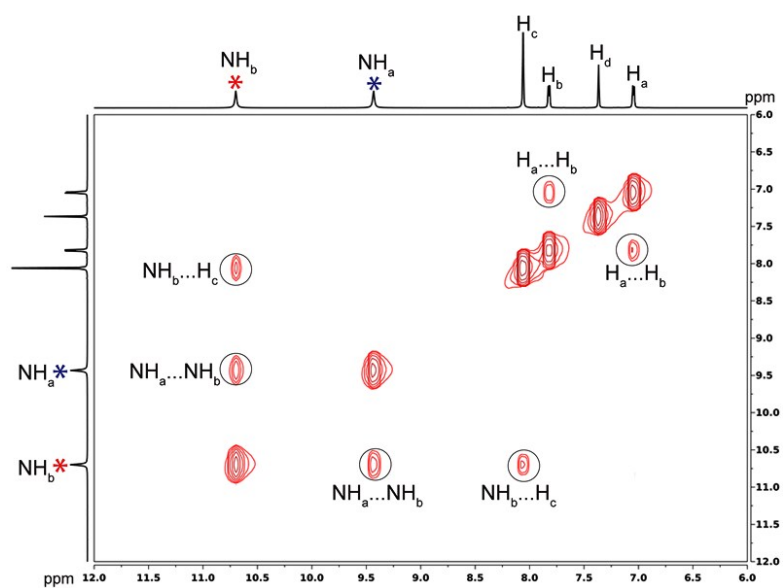

**Figure S34.** 2D-NOESY NMR spectra of complex **6** in DMSO- $d_6$  at 298 K.

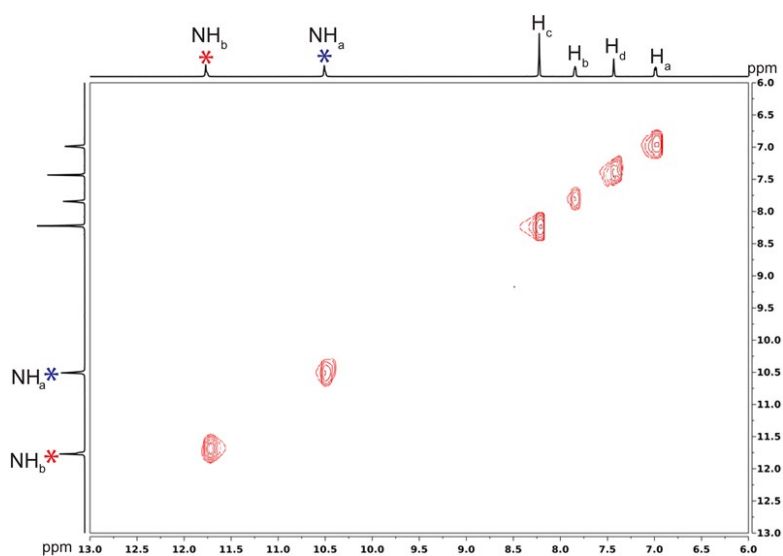

**Figure S35.** 2D-NOESY NMR spectra of complex **6** in presence of excess *n*-TBAF salt in DMSO- $d_6$  at 298 K.

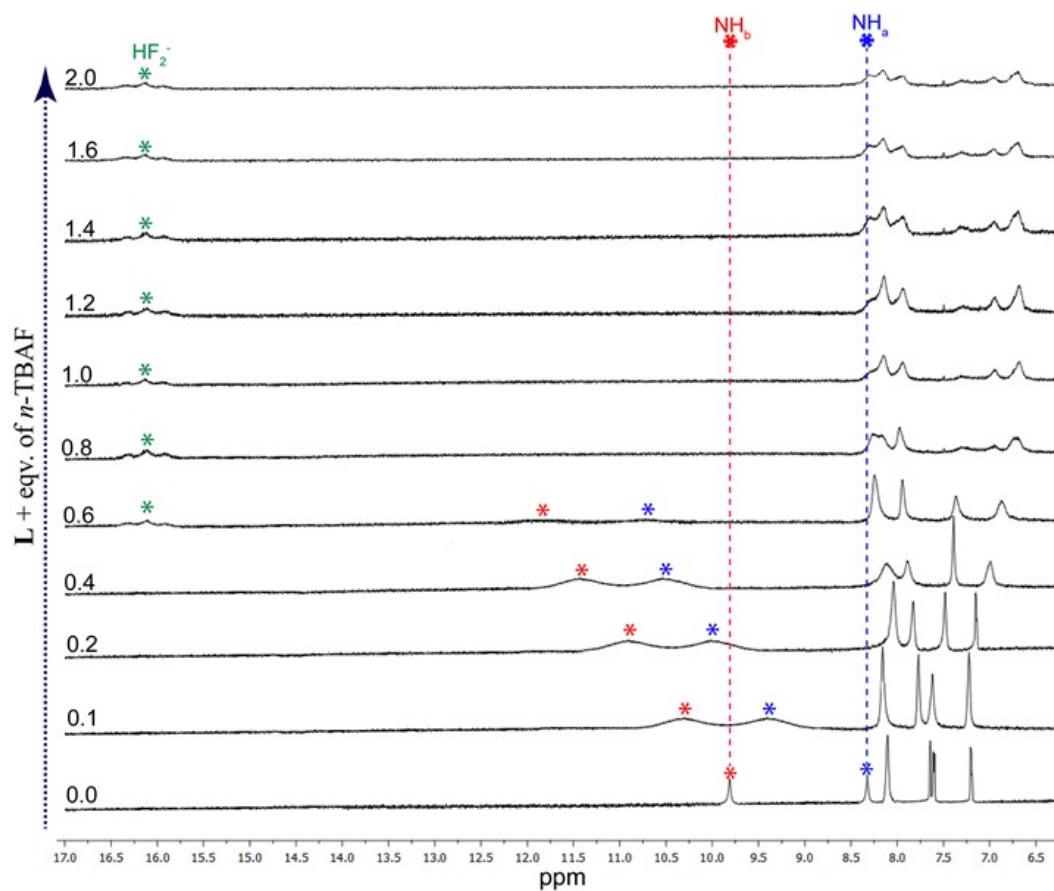

**Figure S36.** Expanded partial  $^1\text{H}$ -NMR spectra of **L** upon titration with *n*-TBAF in DMSO- $d_6$ . Disappearance and broadening of urea  $-\text{NH}$  peaks followed by followed by generation of  $\text{HF}_2^-$  peak.

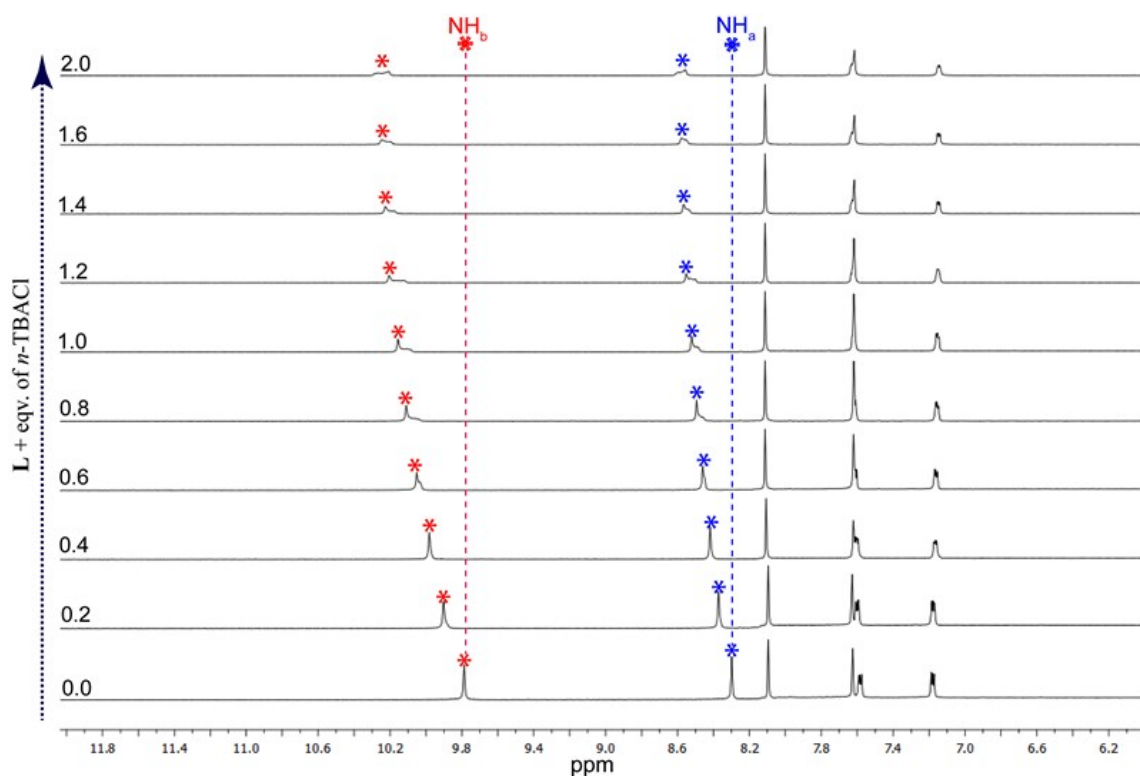

**Figure S37.** Expanded partial  $^1\text{H}$ -NMR spectra of **L** upon titration with *n*-TBACl in  $\text{DMSO-d}_6$ .

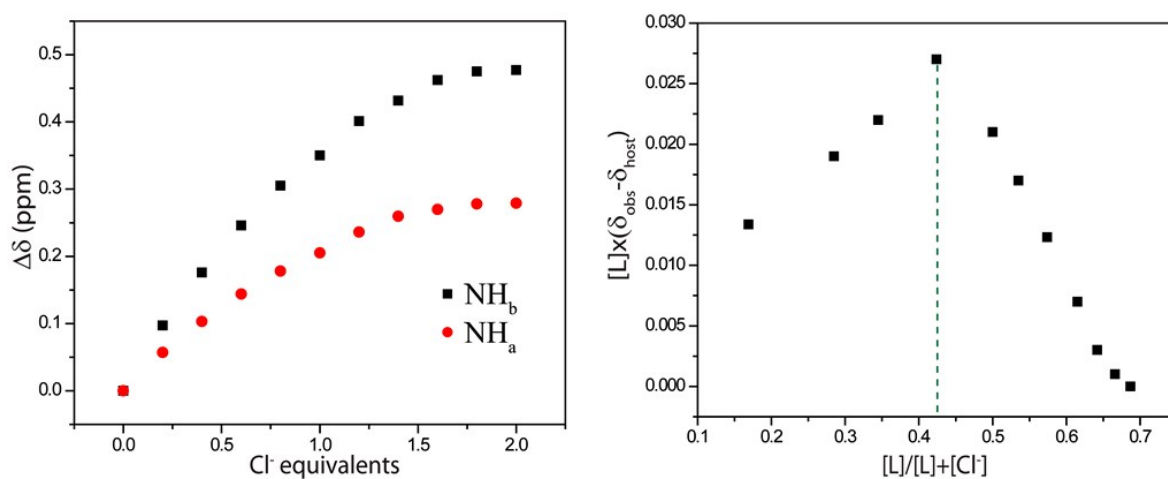

**Figure S38.** Change in chemical shift of  $-\text{NH}$  resonances of **L** (10 mM) with increasing conc. of standard  $\text{Cl}^-$  solution (50 mM) in  $\text{DMSO-d}_6$  at 298 K and the corresponding Job's plot.

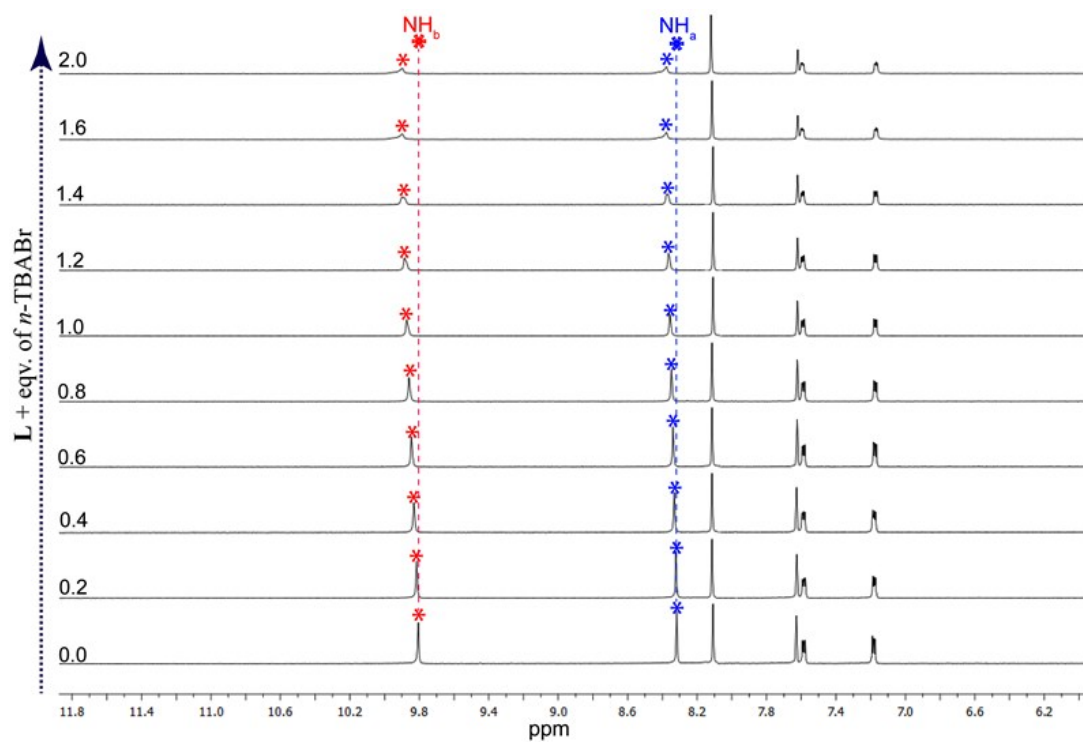

**Figure S39.** Expanded partial  $^1\text{H}$  NMR spectra of **L** upon titration with *n*-TBABr in  $\text{DMSO-d}_6$  and very negligible shift of urea  $-\text{NH}$  signals.

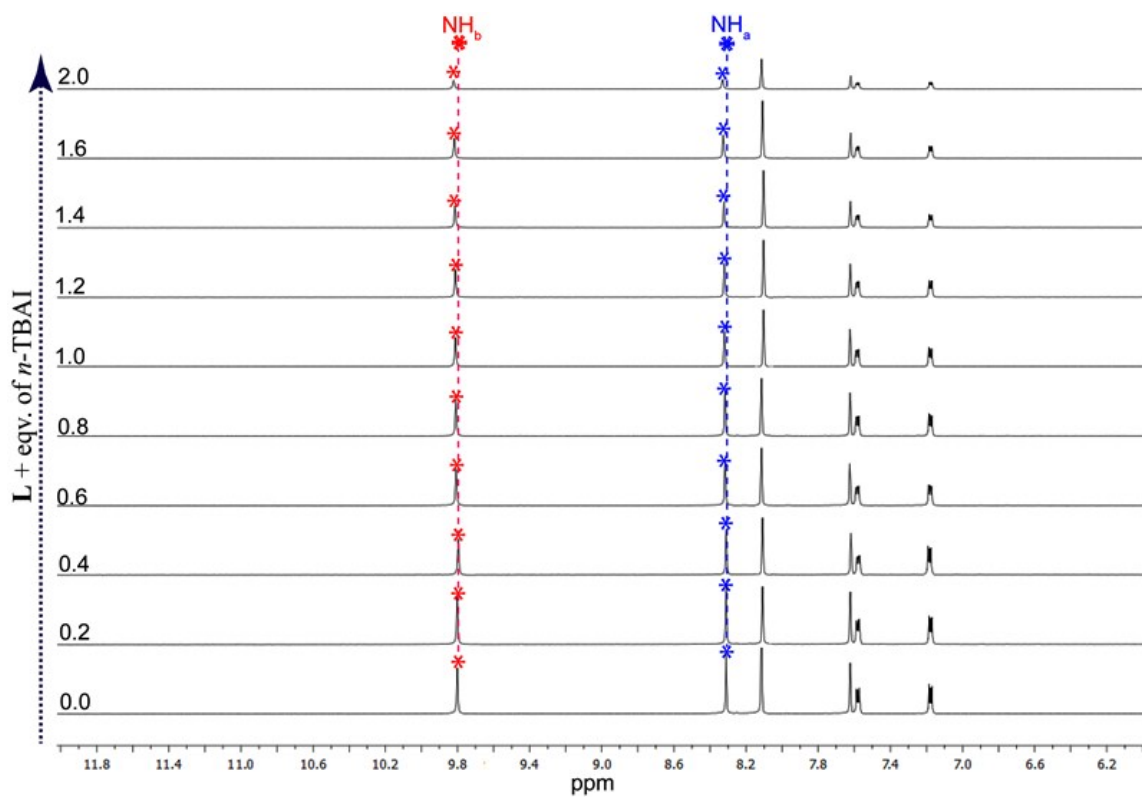

**Figure S40.** Expanded partial  $^1\text{H}$  NMR spectra of **L** upon titration with *n*-TBAI in  $\text{DMSO-d}_6$  and very negligible shift of urea  $-\text{NH}$  signals.

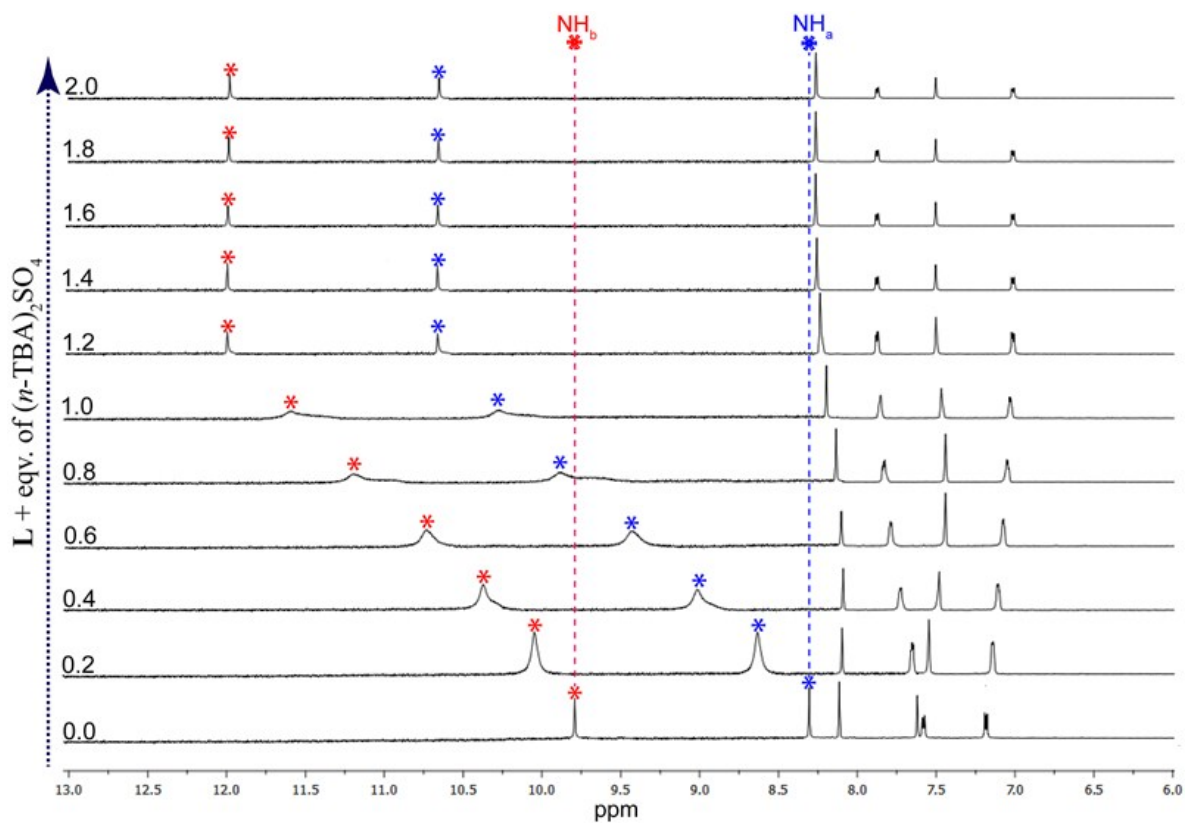

**Figure S41.** Expanded partial  $^1\text{H}$  NMR spectra of **L** upon titration with  $(n\text{-TBA})_2\text{SO}_4$  in  $\text{DMSO-d}_6$ .

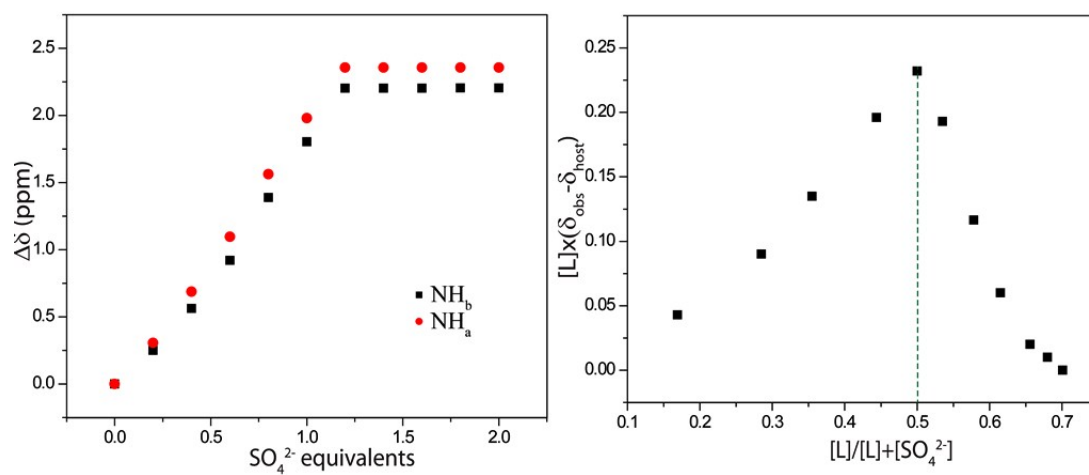

**Figure S42.** Change in chemical shift of  $-\text{NH}$  resonances of **L** (10 mM) with increasing conc. of standard  $\text{SO}_4^{2-}$  solution (50 mM) in  $\text{DMSO-d}_6$  at 298 K and the corresponding Job's plot.

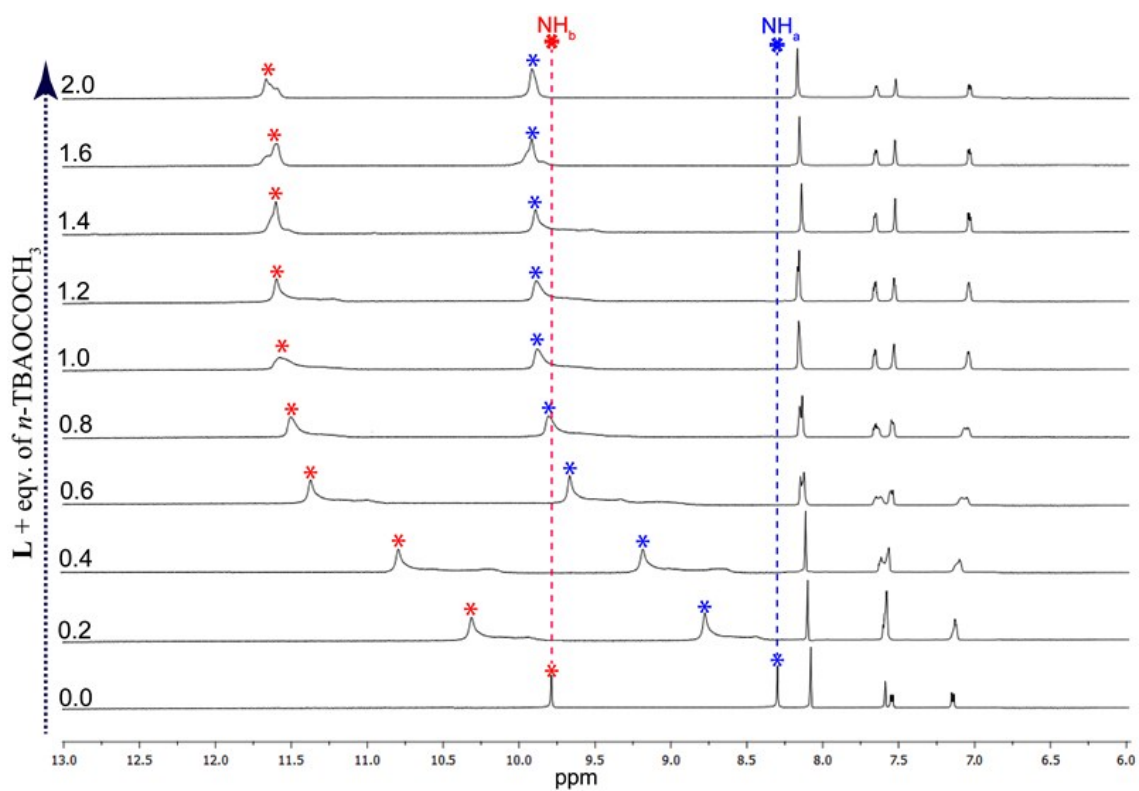

**Figure S43.** Expanded partial  $^1\text{H}$  NMR spectra of **L** upon titration with  $n\text{-TBAOCOCH}_3$  in  $\text{DMSO-d}_6$ .

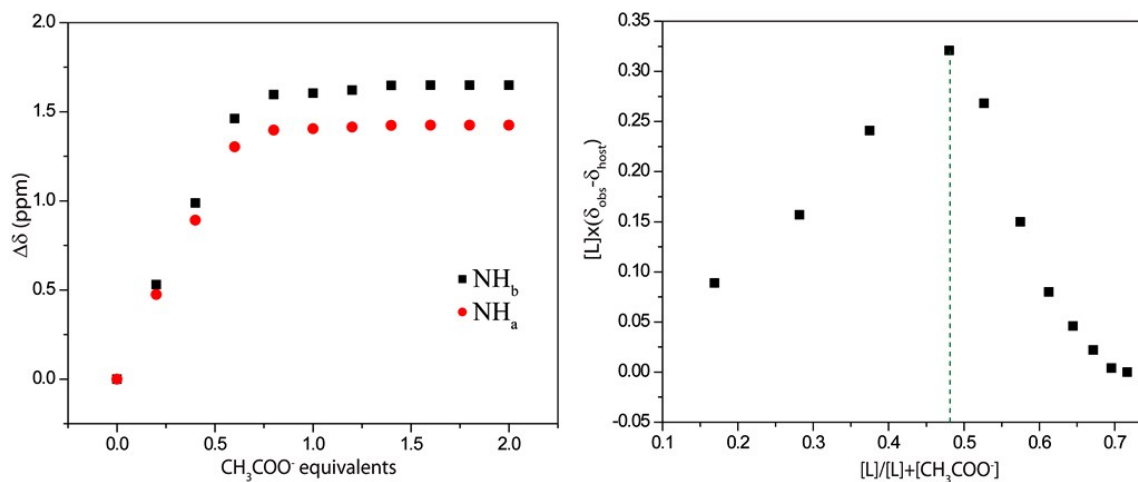

**Figure S44.** Change in chemical shift of  $-\text{NH}$  resonances of **L** (10 mM) with increasing conc. of standard  $\text{CH}_3\text{COO}^-$  solution (50 mM) in  $\text{DMSO-d}_6$  at 298 K and the corresponding Job's plot.



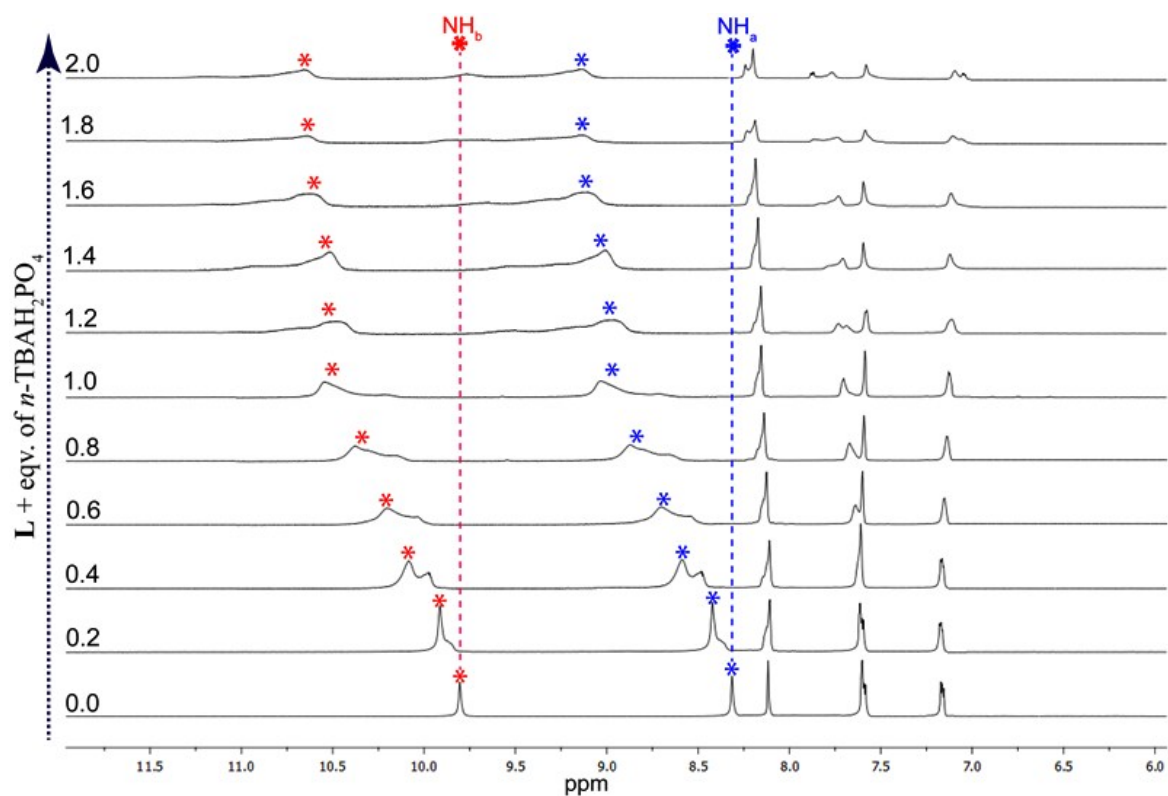

**Figure S45.** Expanded partial  $^1\text{H}$  NMR spectra of **L** upon titration with  $n\text{-TBAH}_2\text{PO}_4$  in  $\text{DMSO-d}_6$ .

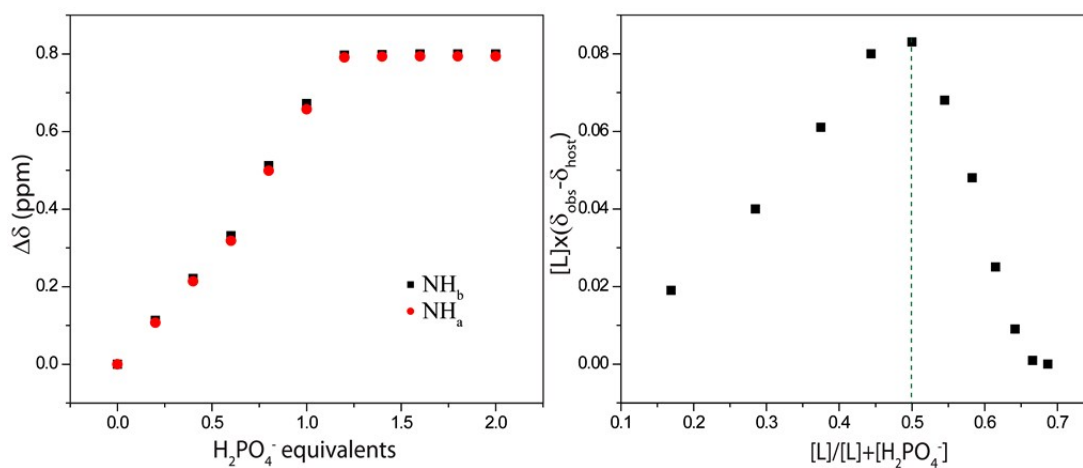

**Figure S46.** Change in chemical shift of  $-\text{NH}$  resonances of **L** (10 mM) with increasing conc. of standard  $\text{H}_2\text{PO}_4^-$  solution (50 mM) in  $\text{DMSO-d}_6$  at 298 K and the corresponding Job's plot.

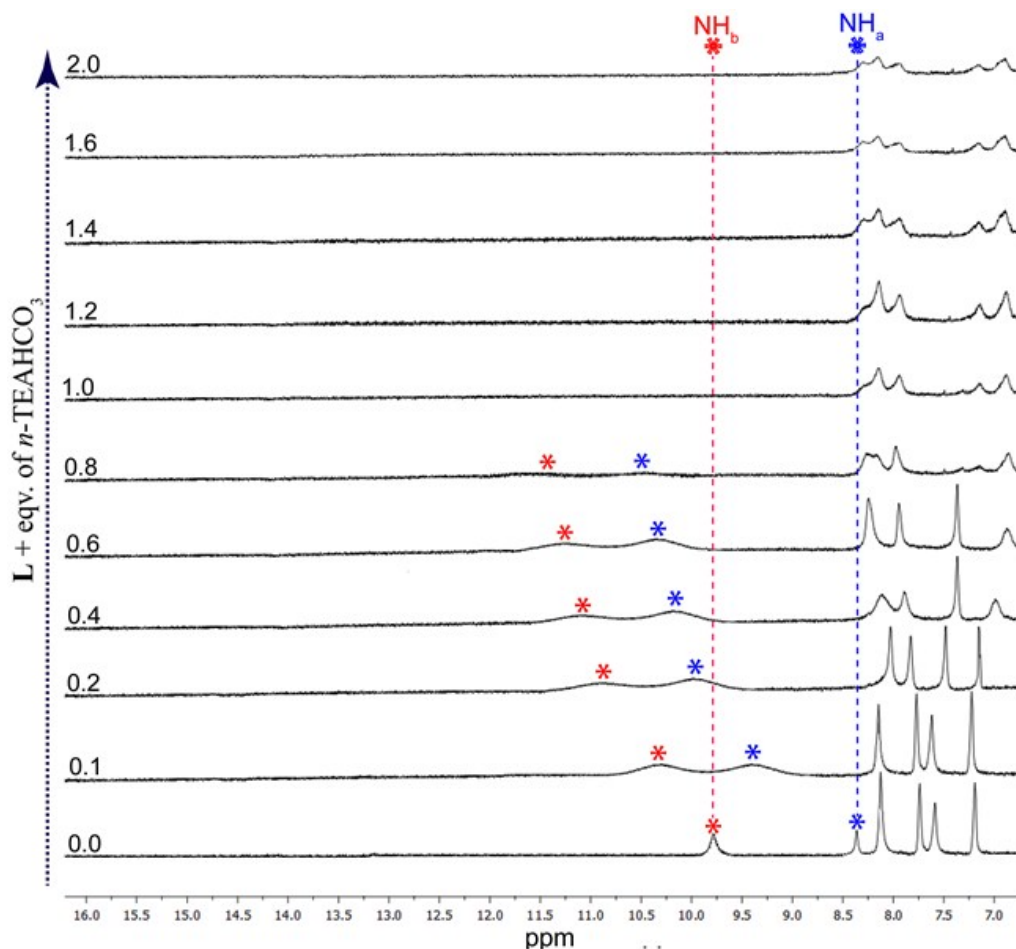

**Figure S47.** Expanded partial  $^1\text{H}$ -NMR spectra of **L** upon titration with  $n\text{-TEAHCO}_3$  in  $\text{DMSO-d}_6$ . Disappearance and broadening of urea  $-\text{NH}$  peaks due to deprotonation.

**Table S1.** Hydrogen bonding distances ( $\text{\AA}$ ) and Bond angles ( $^\circ$ ) in the complexes (**1a**, **1b**, **1c**, **2a**, **2b** and **2c**):

| Complex              | D-H $\cdots$ A         | $d(\text{D}\cdots\text{H})/\text{\AA}$ | $d(\text{H}\cdots\text{A})/\text{\AA}$ | $d(\text{D}\cdots\text{A})/\text{\AA}$ | $\angle\text{D-H}\cdots\text{A}/^\circ$ | Symmetry codes  |
|----------------------|------------------------|----------------------------------------|----------------------------------------|----------------------------------------|-----------------------------------------|-----------------|
| <b>L</b>             | N1-H1N $\cdots$ O3     | 0.86                                   | 2.03                                   | 2.842(4)                               | 157                                     | 1-x,1-y,1-z     |
|                      | N2-H2N $\cdots$ O3     | 0.86                                   | 2.15                                   | 2.947(5)                               | 154                                     | 1-x,1-y,1-z     |
|                      | N3-H3N $\cdots$ O4     | 0.86                                   | 2.31                                   | 3.034(4)                               | 143                                     | 1+x,y,z         |
|                      | N4-H4N $\cdots$ O4     | 0.86                                   | 1.95                                   | 2.790(5)                               | 164                                     | 1+x,y,z         |
|                      | C25-H25B $\cdots$ O1   | 0.96                                   | 2.57                                   | 3.443(7)                               | 152                                     | x,-1+y,z        |
| <b>1</b>             | N1-H1N $\cdots$ F13    | 0.86                                   | 1.91                                   | 2.760(6)                               | 168                                     | -x,1-y,1-z      |
|                      | N2-H2N $\cdots$ O3     | 0.86                                   | 2.05                                   | 2.900(6)                               | 168                                     | -x,1-y,1-z      |
|                      | N3-H3N $\cdots$ O3     | 0.86                                   | 2.53                                   | 3.290(7)                               | 148                                     | -x,1-y,1-z      |
|                      | N4-H4NA $\cdots$ F13   | 0.86                                   | 1.85                                   | 2.665(8)                               | 156                                     | x,y,z           |
|                      | N4-H4NB $\cdots$ F13   | 0.86                                   | 1.88                                   | 2.665(8)                               | 152                                     | x,y,z           |
|                      | O3-H3OA $\cdots$ F13   | 0.85                                   | 1.89                                   | 2.652(6)                               | 148                                     | x,y,z           |
|                      | C33-H33B $\cdots$ F11B | 0.97                                   | 2.52                                   | 3.485 (15)                             | 178                                     | x,3/2-y,-1/2+z  |
|                      | C35-H35A $\cdots$ O2   | 0.97                                   | 2.50                                   | 3.428(11)                              | 145                                     | -x,-1/2+y,1/2-z |
| C37-H37B $\cdots$ O3 | 0.97                   | 2.43                                   | 3.360(8)                               | 161                                    | x,y,z                                   |                 |
| <b>2a</b>            | N1-H1N $\cdots$ Cl1    | 0.86                                   | 2.63                                   | 3.268(3)                               | 132                                     | x,y,z           |

|           |               |      |      |           |     |                |
|-----------|---------------|------|------|-----------|-----|----------------|
|           | N2-H2N...Cl1  | 0.86 | 2.40 | 3.208(3)  | 157 | 1-x,1-y,-z     |
|           | N3-H3N...Cl1  | 0.86 | 2.62 | 3.432(3)  | 157 | x,y,z          |
|           | N4-H4N...Cl1  | 0.86 | 2.35 | 3.201(3)  | 170 | x,y,z          |
|           | C25-H25A...O1 | 0.97 | 2.53 | 3.244(5)  | 130 | x,1/2-y,1/2+z  |
|           | C29-H29B...O1 | 0.97 | 2.48 | 3.245(5)  | 136 | x,1/2-y, 1/2+z |
| <b>2b</b> | N1-H1N...Cl1  | 0.86 | 2.71 | 3.304(3)  | 127 | x,y,z          |
|           | N2-H2N...Cl1  | 0.86 | 2.40 | 3.251(4)  | 169 | -x,1-y,1-z     |
|           | N3-H3N...Cl1  | 0.86 | 2.71 | 3.288(4)  | 151 | x,y,z          |
|           | N4-H4N...Cl1  | 0.86 | 2.38 | 3.233(4)  | 172 | x,y,z          |
| <b>3</b>  | N1-H1N...Br1  | 0.86 | 2.51 | 3.362(5)  | 171 | x,y,z          |
|           | N2-H2N...Br1  | 0.86 | 2.77 | 3.588(5)  | 158 | x,y,z          |
|           | N3-H3N...Br1  | 0.86 | 2.55 | 3.326(5)  | 150 | -x,1-y,1-z     |
|           | N4-H4N...Br1  | 0.86 | 2.76 | 3.380(5)  | 131 | x,y,z          |
|           | C29-H29A...O2 | 0.97 | 2.55 | 3.360(9)  | 141 | x,1/2-y,-1/2+z |
|           | C37-H37A...O2 | 0.97 | 2.53 | 3.339(9)  | 140 | x,1/2-y,-1/2+z |
| <b>4</b>  | N1-H1N...I1   | 0.86 | 2.93 | 3.555(14) | 131 | x,y,z          |
|           | N2-H2N...I1   | 0.86 | 2.83 | 3.517(12) | 138 | -x,1-y,1-z     |
|           | N3-H3N...I1   | 0.86 | 3.02 | 3.830(12) | 158 | x,y,z          |
|           | N4-H4N...I1   | 0.86 | 2.76 | 3.607(13) | 170 | x,y,z          |
|           | C33-H33B...O1 | 0.97 | 2.57 | 3.40 (2)  | 143 | x,3/2-y,-1/2+z |
| <b>5</b>  | N1-H1N...O3   | 0.86 | 1.87 | 2.686(4)  | 158 | x,y,z          |
|           | N2-H2N...O4   | 0.86 | 2.27 | 3.051(5)  | 151 | x,y,z          |
|           | N3-H3N...O4   | 0.86 | 1.87 | 2.689(5)  | 159 | x,y,z          |
|           | N4-H4N...O4   | 0.86 | 2.21 | 2.943(6)  | 142 | x,y,z          |
|           | N4-H4N...O4   | 0.86 | 2.53 | 3.357(5)  | 162 | 3/2-x,1/2-y,z  |
|           | C33-H61A...O1 | 0.97 | 2.48 | 3.387(5)  | 156 | -1+x,y,z       |
|           | C35-H63B...O1 | 0.97 | 2.56 | 3.450(5)  | 152 | -1+x,y,z       |
|           | N1-H1N...O6   | 0.86 | 2.01 | 2.84(9)   | 158 | x,y,z          |
|           | N2-H2N...O6   | 0.86 | 2.18 | 2.96(8)   | 151 | x,y,z          |
|           | N3-H3N...O5   | 0.86 | 2.18 | 2.95(8)   | 149 | x,y,z          |
|           | N4-H4N...O5   | 0.86 | 2.07 | 2.87(9)   | 154 | x,y,z          |
|           | N5-H5N...O6   | 0.87 | 1.99 | 2.83(10)  | 162 | x,y,z          |
|           | N6-H6N...O7   | 0.86 | 1.97 | 2.83(10)  | 173 | x,y,z          |
|           | N7-H7N...O7   | 0.86 | 2.12 | 2.94(9)   | 159 | x,y,z          |
|           | N8-H8N...O8   | 0.86 | 1.91 | 2.76(9)   | 169 | x,y,z          |
| <b>6</b>  | C45-H45...F24 | 0.92 | 2.52 | 3.44(14)  | 174 | 1-x,-y,1-z     |
|           | C58-H58B...O3 | 0.98 | 2.55 | 3.47(12)  | 158 | x,y,z          |
|           | C65-H65C...O4 | 0.97 | 2.50 | 3.43(16)  | 161 | x,y,z          |
|           | C69-H69A...O5 | 1.10 | 2.20 | 3.22(14)  | 176 | 1+x,y,z        |

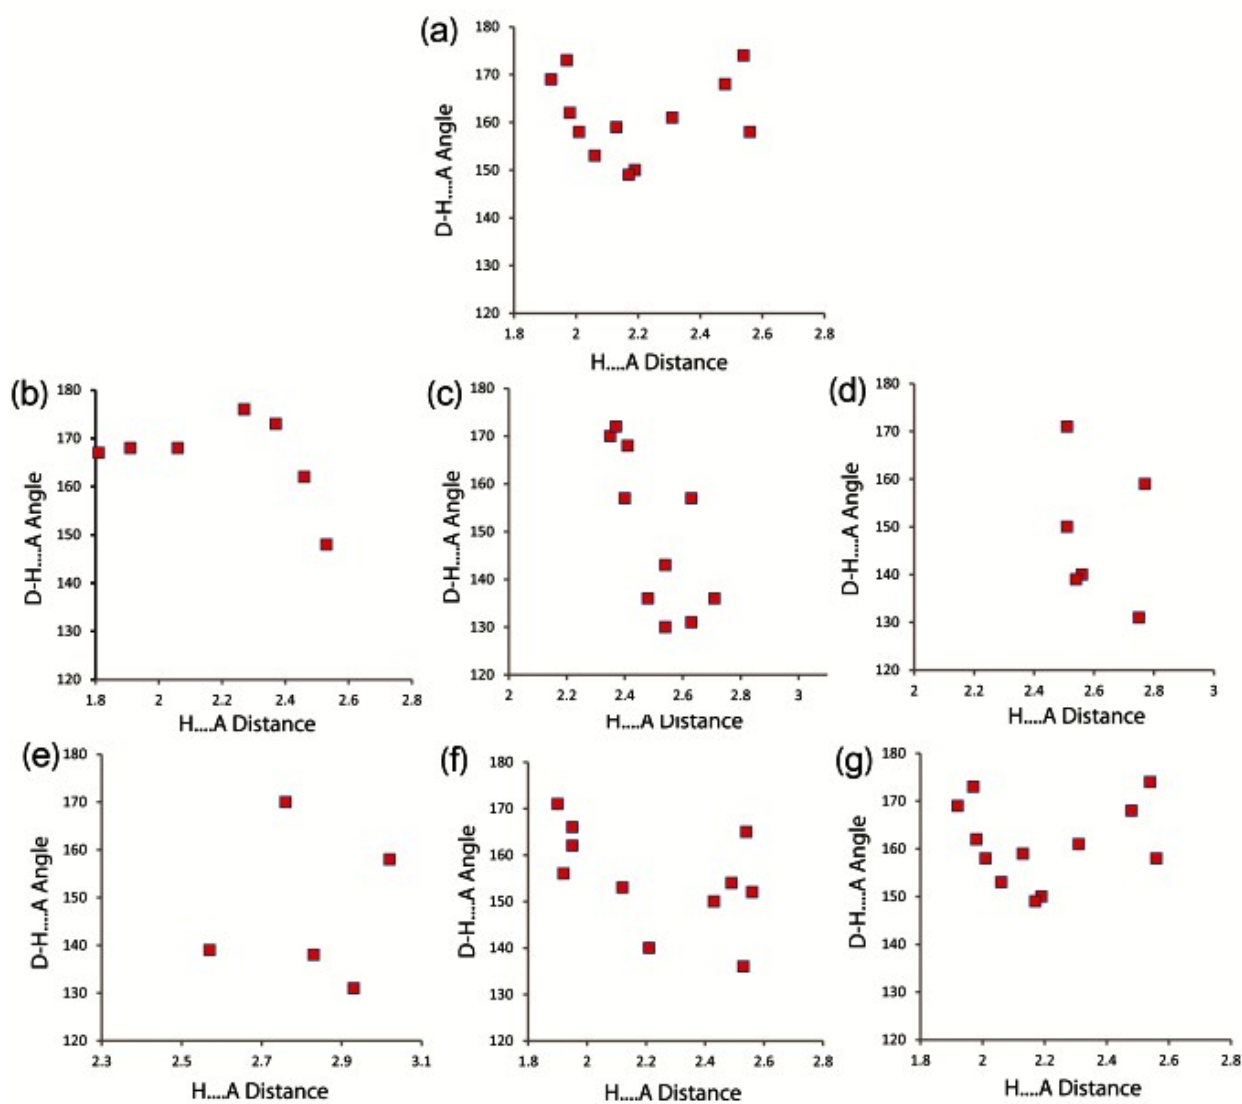

**Figure S48.** The scatter plot of D–H···A angle vs. H···A distance of the hydrogen bonds in the (a) free receptor L (b) complex 1, (c) complex 2a and 2b, (d) complex 3, (e) complex 4, (f) complex 5 and (g) complex 6.

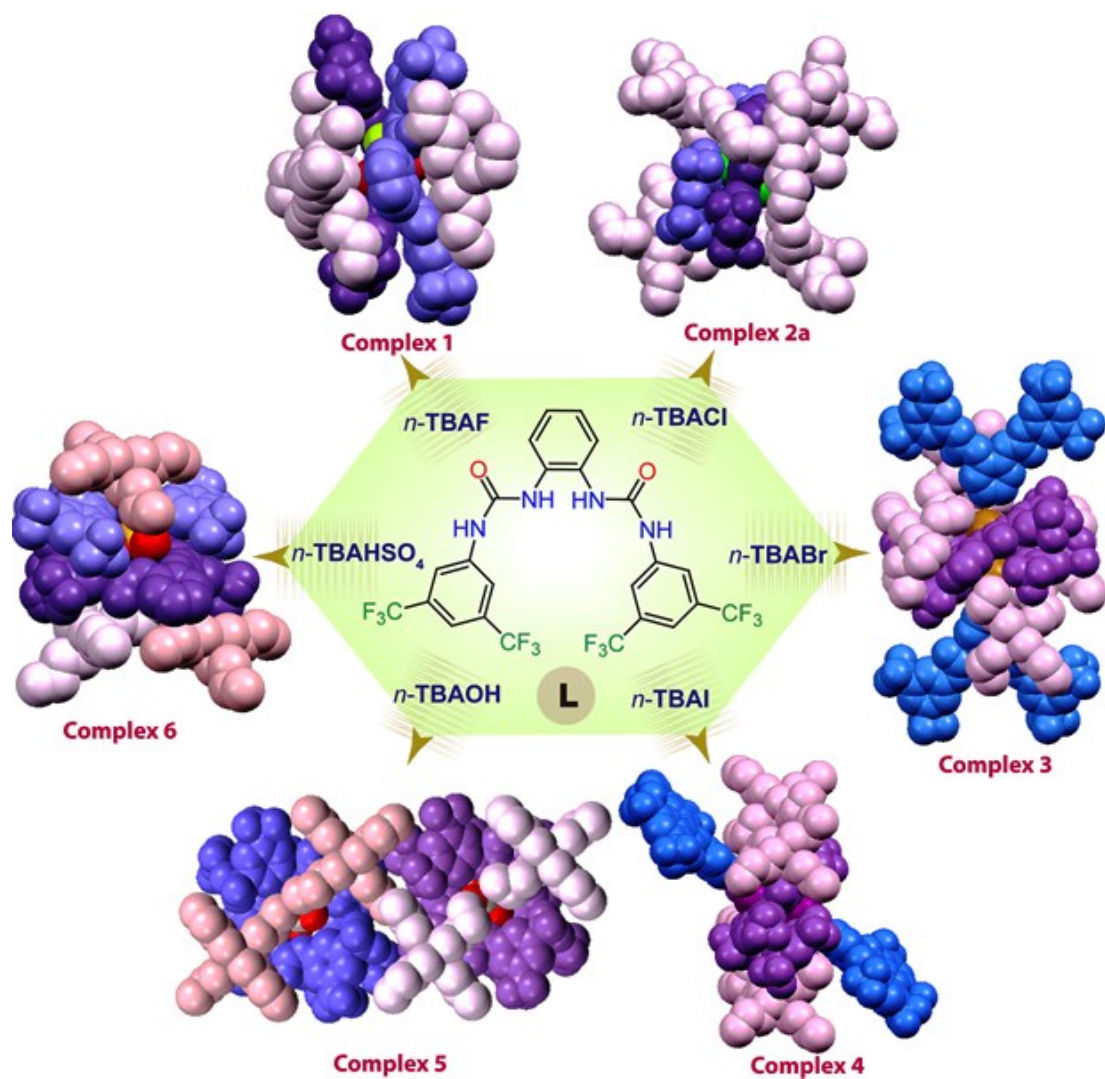

**Scheme S49:** Partial X-ray structures in space-fill model of all anion complexes depicting systematic and consistent anion binding uniformity of *meta*-disubstituted receptors toward spherical fluoride(hydrated), chloride, bromide, iodide, planar carbonate and tetrahedral sulphate anions.

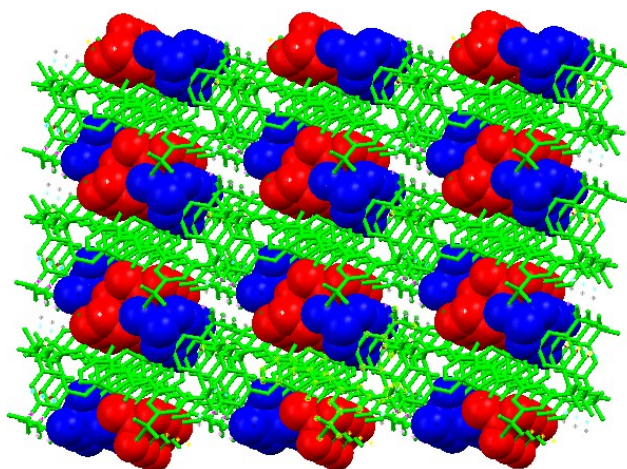

**Figure S50.** X-ray structures of DMSO solvated free receptor L depicting packing motif as viewed down from crystallographic *b* axis by symmetry equivalence.

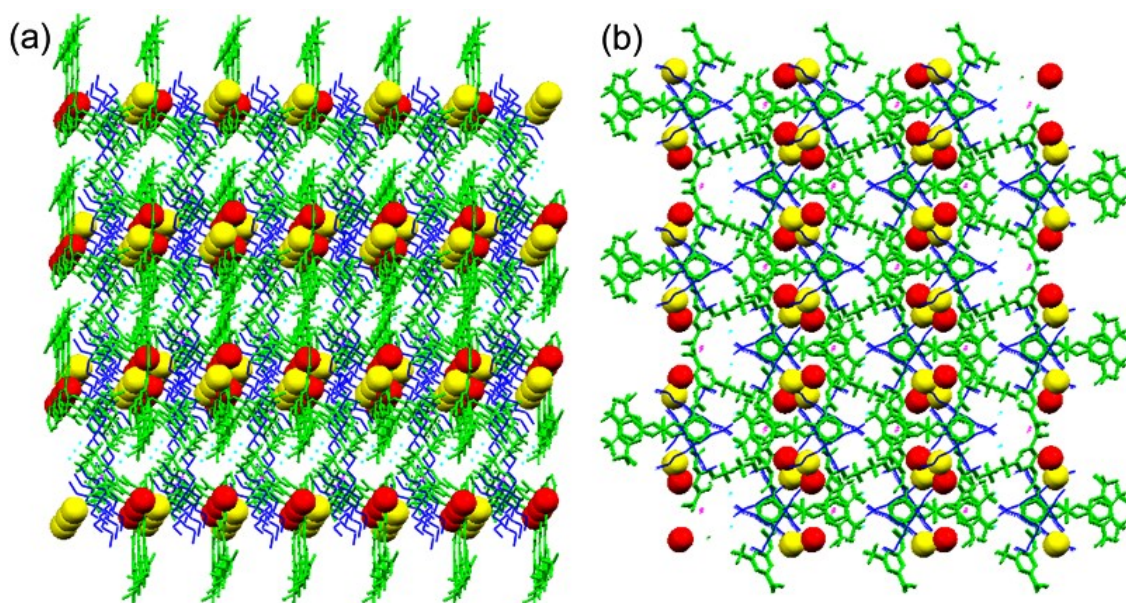

**Figure S51.** X-ray structures depicting (a) packing motif of hydrated receptor-fluoride (*n*-TBA counteraction) complex **1** as viewed down from crystallographic *b* axis by symmetry equivalence and (b) packing motif along the crystallographic *c* axis by symmetry equivalence.

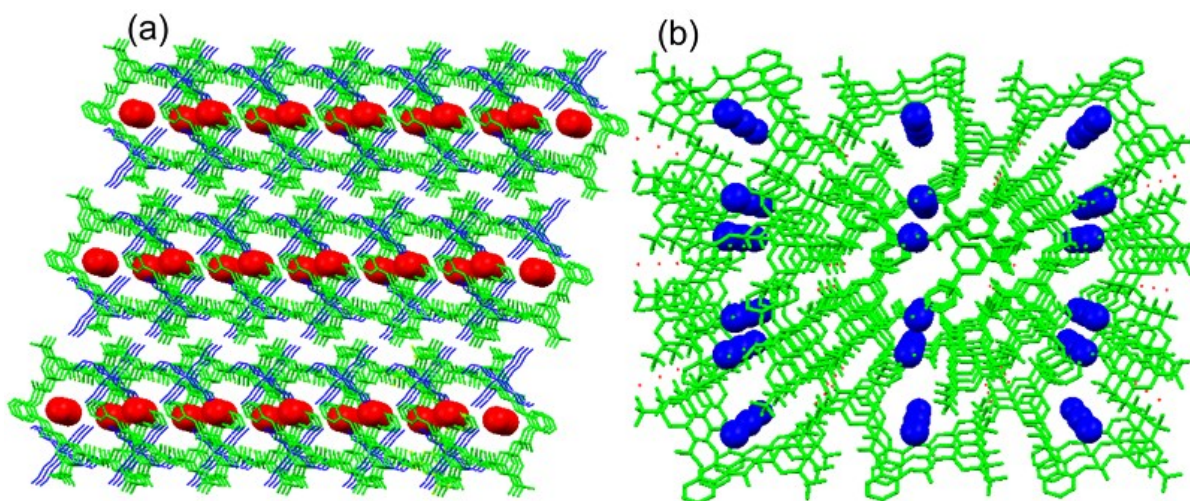

**Figure S52.** X-ray structures depicting (a) packing motif of 2:2 L-Chloride (*n*-TBA counteraction) complex **2a** as viewed down from crystallographic *b* axis by symmetry equivalence and (b) packing motif of 2:2 L-Cl (TEA counteraction) complex **2b** as viewed down from crystallographic *b* axis by symmetry equivalence.

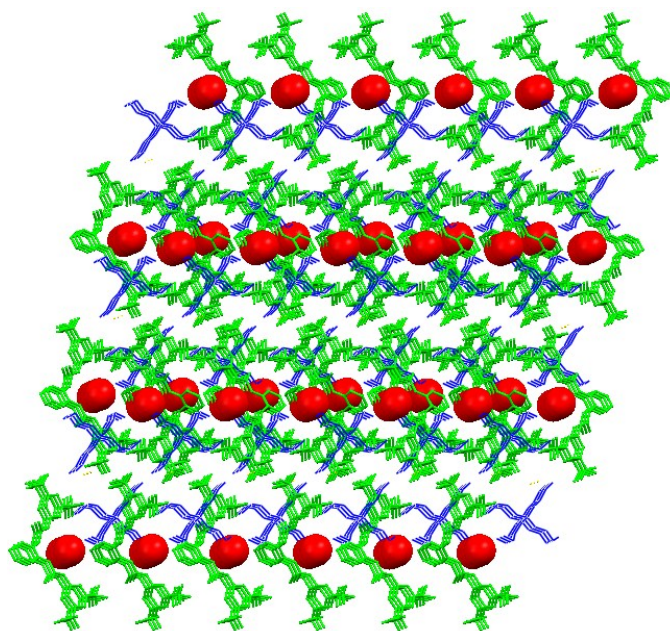

**Figure S53.** X-ray structures depicting packing motif of 2:2 L-bromide (*n*-TBA countercation) complex **3** as viewed down from crystallographic *b* axis by symmetry equivalence.

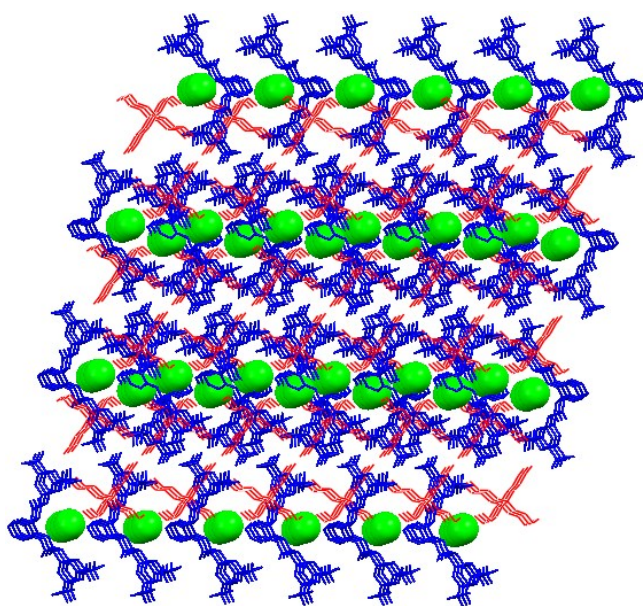

**Figure S54.** X-ray structures depicting packing motif of 2:2 L-iodide (*n*-TBA countercation) complex **4** as viewed down from crystallographic *b* axis by symmetry equivalence.

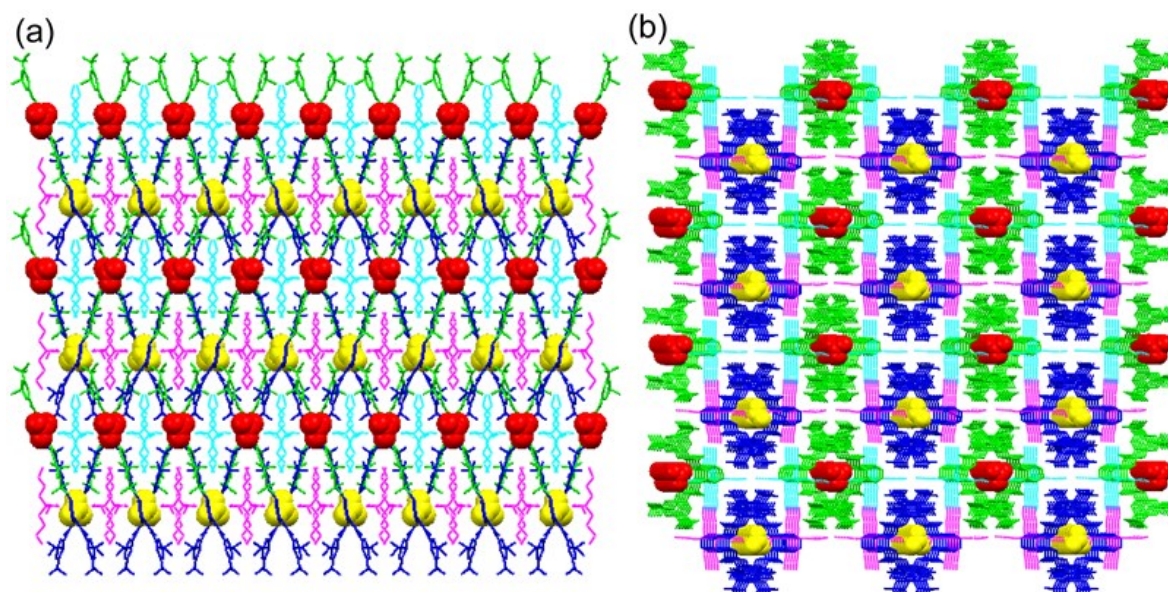

**Figure S55.** X-ray structures depicting packing motif of 2:1 L-carbonate (*n*-TBA counteraction) complex **5** as viewed down from crystallographic *b* axis.

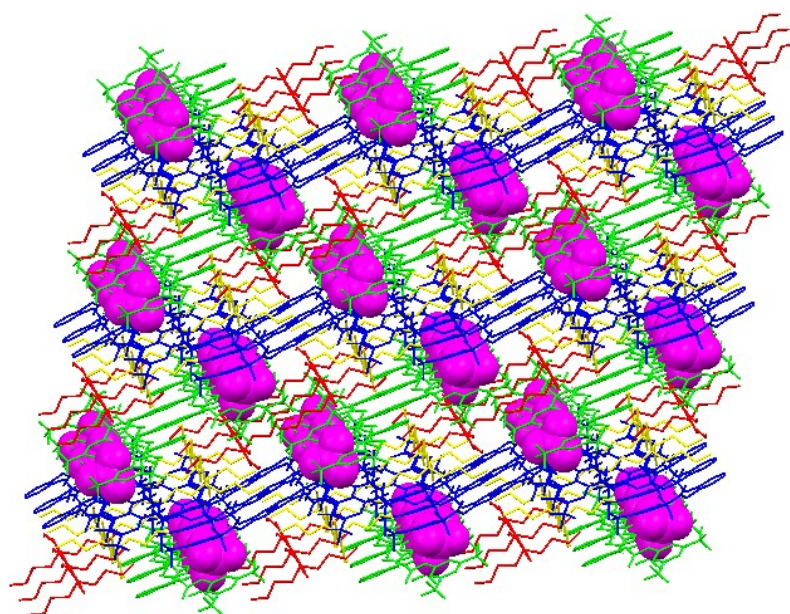

**Figure S56.** X-ray structures depicting packing motif of 2:1 L-sulphate (*n*-TBA counteraction) complex **6** as viewed down from crystallographic *b* axis by symmetry equivalence.
